# Supplementary material for: Histone deacetylase 9 promotes endothelial-mesenchymal transition and an unfavorable atherosclerotic plaque phenotype
Source: PubMed Central journal article supplement (PMC8321575; doi:10.1172/jci131178), 2021-08-02
Supplement: jci-131-131178-s017.pdf [file jci-131-131178-s017.pdf]

## SUPPLEMENTAL DATA

### **Histone deacetylase 9 promotes endothelial to mesenchymal transition and an unfavorable atherosclerotic plaque phenotype**

Laura Lecce,<sup>#</sup> Yang Xu,<sup>#</sup> Bhargavi V'Gangula, Nirupama Chandel, Venu Pothula, Axelle Caudrillier, Maria Paola Santini, Valentina d'Escamard, Delaine K. Ceholski, Przemek A. Gorski, Lijiang Ma, Simon Koplev, Martin Mæng Bjørklund, Johan L.M. Björkegren, Manfred Boehm, Jacob Fog Bentzon, Valentin Fuster, Ha Won Kim, Neal L. Weintraub, Andrew H. Baker, Emily Bernstein, Jason C Kovacic.

<sup>#</sup> Equal contribution

## **SUPPLEMENTAL TABLES**

**Table S1. HBSS<sup>++</sup> buffer for mouse primary lung endothelial cell (MPLEC) tissue culture.**

| <b>Reagent</b>    | <b>Company</b>           | <b>Catalog number</b> | <b>Volume</b> |
|-------------------|--------------------------|-----------------------|---------------|
| HBSS              | Thermo Fisher Scientific | 14175095              | 243.5ml       |
| Calcium Chloride  | Millipore Sigma          | 21115                 | 0.5ml         |
| Magnesium Sulfate | Millipore Sigma          | M3409                 | 1ml           |
| 1M HEPES          | Thermo Fisher Scientific | 15630080              | 5ml           |

**Table S2. Primer list for mouse genotyping.**

| <b>Gene</b>                    | <b>Forward Primer</b>              | <b>Reverse Primer</b>              |
|--------------------------------|------------------------------------|------------------------------------|
| <i>Hdac9<sup>fl/fl</sup></i>   | ACCAAATACCAGTCCATGGAAG             | GACCTTTACCACCTCATAGAGAC            |
| <i>Cdh5-CreER<sup>T2</sup></i> | GCATTACCGGTCGATGCAACGA<br>GTGATGAG | GAGTGAACGAACCTGGTCGAAATCA<br>GTGCG |

**Table S3. Human primer list for RT-qPCR.**

| <b>Gene</b>                                                                                                                                                              | <b>Forward Primer</b>                        | <b>Reverse Primer</b>     |
|--------------------------------------------------------------------------------------------------------------------------------------------------------------------------|----------------------------------------------|---------------------------|
| <i>ZO2</i>                                                                                                                                                               | AGGAGGTGGGAGAGAGCAGT                         | CTTGTGCGTTTTGATTGGAA      |
| <i>ICAM2</i>                                                                                                                                                             | CCTTGTCACCTTGTACACAA                         | CAGAGAGGGGAACGGACTAA      |
| <i>Occludin</i>                                                                                                                                                          | TGCATGTTTCGACCAATGC                          | AAGCCACTTCCTCCATAAGG      |
| <i>eNOS</i>                                                                                                                                                              | GTGGCTGTCTGCATGGACCT                         | CCACGATGGTGACTTTGGCT      |
| <i>SM22<math>\alpha</math></i>                                                                                                                                           | GTTCCAGACTGTTGACCTCTT                        | CTGCGCTTTCTTCATAAACC      |
| <i>FAP</i>                                                                                                                                                               | CAAGTGGCAAGTGGGAGGCCA                        | TGGGGATGCCTGGGCCGTAG      |
| <i>Versican</i>                                                                                                                                                          | GGTGCACCTTTGTGAGCAAGA                        | TTCGTGAGACAGGATGCTTG      |
| <i>Calponin</i>                                                                                                                                                          | GGCCAGCATGGCGAAGACGAAA                       | TGTGCCCAGCTTGGGGTTCGT     |
| <i>Vimentin</i>                                                                                                                                                          | GGCTCAGATTCAGGAACAGC                         | AGCCTCAGAGAGGTCAGCAA      |
| $\alpha$ SMA                                                                                                                                                             | CAAGTGATCACCATCGGAAAT                        | GACTCCATCCCGATGAAGGA      |
| <i>SNAIL</i>                                                                                                                                                             | GCACGGCCTAGCGAGTGGTT                         | GGGCTGCTGGAAGGTAAACTCTGG  |
| <i>SLUG</i>                                                                                                                                                              | AACTCACACGGGGGAGAAGCCT                       | CAGTGTGCTACACAGCAGCCAGA   |
| <i>SMAD2</i>                                                                                                                                                             | AGTGCCCCGACACACCGAGA                         | TCTGCTGGAGAGCCTGTGTCC     |
| <i>SMAD3</i>                                                                                                                                                             | TCAAGAAGACGGGGCAGCTGGA                       | GCACCAACACAGGAGGTAGAACTGG |
| <i>HDAC1</i>                                                                                                                                                             | CCTGAGGAGAGTGGCGATGA                         | GTTTGTGAGAGGAGCAGATCGA    |
| <i>HDAC2</i>                                                                                                                                                             | GCTCTCAACTGGCGGTTTACG                        | AGCCCAATTAACAGCCATATCAG   |
| <i>HDAC3</i>                                                                                                                                                             | GCTTCCACTCCGAGGACTAC                         | CTTGTTGTTTACAGCTGGGTTG    |
| <i>HDAC4</i>                                                                                                                                                             | AGACTTGTGGCACGAGAAGG                         | GGTGCTCAGGTAGGGAGTGA      |
| <i>HDAC5</i>                                                                                                                                                             | AGCTCCTGTTTCGCTGAGTTC                        | TGCTTCTCCAGCTCTTCCTG      |
| <i>HDAC6</i>                                                                                                                                                             | AGATACTGGCGCAGCTTACG                         | GTTAGTCTGGCCTGGAGTGG      |
| <i>HDAC7</i>                                                                                                                                                             | CAGGGGCTGACAAAGAAGAA                         | AGGCTGTTCTCTGGTTCCAA      |
| <i>HDAC8</i>                                                                                                                                                             | AAGCCTAAAGTGGCCTCCAT                         | TGTGATCGTAGCCCCCTCCTA     |
| <i>HDAC9</i>                                                                                                                                                             | CAGCAACAAATCCAGAAGCA                         | GTTCTCTGCGATGCCTCTCT      |
| <i>HDAC10</i>                                                                                                                                                            | GTTTCCTGAGCTGCATCTTG                         | GCTGCCCTCTCAGGTACATC      |
| <i>18S</i>                                                                                                                                                               | TTTCGGAAGTGGGCCATGA                          | GCAAATGCTTTTCGCTCTGGTC    |
| Specific to Figure S3 only, the following TaqMan™ primers were used. For RT-qPCR of <i>HDAC9</i> in Figure S3, the above forward and reverse primer sequences were used. |                                              |                           |
| <b>Gene</b>                                                                                                                                                              | <b>TaqMan™ Assay ID (Applied Biosystems)</b> |                           |
| <i>UBC</i>                                                                                                                                                               | Hs01871556_s1                                |                           |
| <i>CD31</i>                                                                                                                                                              | Hs01065282_m1                                |                           |
| <i>CDH5</i>                                                                                                                                                              | Hs00901465_m1                                |                           |
| <i>SLUG</i>                                                                                                                                                              | Hs00161904_m1                                |                           |
| $\alpha$ SMA                                                                                                                                                             | Hs00426835_g1                                |                           |
| <i>COL1A1</i>                                                                                                                                                            | Hs00164004_m1                                |                           |
| <i>eNOS</i>                                                                                                                                                              | Hs01574659_m1                                |                           |
| <i>SM22<math>\alpha</math></i>                                                                                                                                           | Hs01038777_g1                                |                           |

**Table S4. Mouse primer list for RT-qPCR.**

| <b>Gene</b>                    | <b>Forward Primer</b>   | <b>Reverse Primer</b>  |
|--------------------------------|-------------------------|------------------------|
| <i>CD31</i>                    | ATCGGCAAAGTGGTCAAGAG    | AATGGCAATTATCCGCTCTG   |
| <i>Icam2</i>                   | ACGGTCTCAACTTTTCCTGCC   | TGCATCGGCTCATAGACTTCAA |
| <i>Sm22<math>\alpha</math></i> | ACGACCAAGCCTTCTCTGCCTCA | CCACGATCTGGGCGGCCTAC   |
| <i>Hdac9</i>                   | AGCAGATCCAGAAGCAGCTC    | TGCTCCAGTTTCTGCTCCTT   |
| <i>18S</i>                     | TTTCGGAACTGAGGCCATGA    | GCAAATGCTTTCGCTCTGGTC  |

**Table S5. Primers used for CHIP-PCR.**

| <b>Gene</b>            | <b>Forward Primer</b> | <b>Reverse Primer</b> |
|------------------------|-----------------------|-----------------------|
| ZO2 set-a (Promoter 1) | GGGTAGAGGAGCTGACAT    | GAATTTGCTGGGCTTCTTTC  |
| ZO2 set-b (Promoter 1) | AAGCCCAGCAAATTCCTCTT  | GGGAGACCTTTGTCACTGGA  |
| ZO2 set-c (Promoter 2) | AGCTCACTCCAGGTCTC     | ACTGGAGCAAGCAGGTC     |
| <i>ICAM2</i> set-a     | CACGGCTTATTCAGTCTTCTC | TGGAGCTAAATGAGGCTAGT  |
| <i>ICAM2</i> set-b     | CCTGTGGGCTCCAAGAA     | GACTGAATAAGCCGTGAACTG |
| <i>FAP</i> set-a       | TGCCATCTGGTGAAATTTAGT | CATTCTTCCAAGGTCTGCT   |

**Table S6. Primary antibody list.**

| Antibody      | Company                                                | Catalog number                | Dilution or concentration used  | Experimental technique                                             |
|---------------|--------------------------------------------------------|-------------------------------|---------------------------------|--------------------------------------------------------------------|
| H3K4me1       | Abcam                                                  | ab8895                        | 1µg/ml                          | WB                                                                 |
| H3K4me3       | EMD Millipore                                          | 05-745R                       | 1:10,000                        | WB                                                                 |
| H3K9ac        | EMD Millipore                                          | 07-352                        | 1:5000<br>4µl                   | WB<br>ChIP                                                         |
| H3K9me3       | EMD Millipore                                          | 07-442                        | 1:1000                          | WB                                                                 |
| H3K27ac       | Abcam                                                  | ab4729                        | 1µg/ml<br>4µl                   | WB<br>ChIP                                                         |
| H3K27me3      | EMD Millipore                                          | 07-449                        | 1:2,500                         | WB                                                                 |
| H3K36me3      | EMD Millipore                                          | 07-549                        | 1:1000                          | WB                                                                 |
| Pan-H4        | EMD Millipore                                          | 05-858                        | 1:10,000                        | WB                                                                 |
| HDAC4         | Santa Cruz Biotechnology                               | sc-365093                     | 0.4µg/ml                        | WB                                                                 |
| HDAC5         | Novus Biologicals                                      | NBP2-22152                    | 2µg/ml                          | WB                                                                 |
| HDAC7         | Cell Signaling Technology                              | 33418                         | 1:1000                          | WB                                                                 |
| HDAC9         | Novus Biologicals<br>Abcam                             | NBP2-03993<br>ab109446        | 0.5µg/ml<br>11.98µg/ml          | WB<br>ICC and IF                                                   |
| GAPDH         | Abcam                                                  | ab181602                      | 21µg/ml                         | WB                                                                 |
| ZO2           | Santa Cruz Biotechnology                               | sc-11448                      | 0.13µg/ml                       | WB                                                                 |
| ICAM2         | Bethyl Laboratories                                    | A304-348A                     | 1:1500                          | WB                                                                 |
| CD31          | Abcam<br>BD Biosciences                                | ab9498<br>550274              | 0.15µg/ml<br>0.31µg/ml          | WB<br>IF                                                           |
| SM22 $\alpha$ | Abcam                                                  | ab14106                       | 0.7µg/ml<br>7µg/ml              | WB<br>IF                                                           |
| $\alpha$ SMA  | Abcam<br>Abcam<br><br>Sigma Aldrich                    | ab5694<br>ab5694<br><br>F3777 | 0.2µg/ml<br>2µg/ml<br><br>1:100 | WB<br>IF (CD31- $\alpha$ SMA)<br>IF (CD31-<br>HDAC9- $\alpha$ SMA) |
| Vimentin      | Cell Signaling Technology                              | 5741                          | 1:1000                          | WB                                                                 |
| FAP           | Bioss                                                  | bs-5758R-<br>A647             | 2µl/1x10 <sup>6</sup> cells     | FC                                                                 |
| pSMAD2        | Cell Signaling Technology<br>Cell Signaling Technology | 3108<br>3108                  | 1:1000<br>1:100                 | WB<br>IF                                                           |
| SMAD2         | Cell Signaling Technology                              | 5339                          | 1:1000                          | WB                                                                 |

|         |                           |            |                    |           |
|---------|---------------------------|------------|--------------------|-----------|
| pSMAD3* | Abcam                     | ab51451    | 1µg/ml             | WB        |
| SMAD3   | Cell Signaling Technology | 9513       | 1:1000             | WB        |
| SLUG    | Novus Biologicals         | NBP2-27182 | 0.2µg/ml           | WB        |
| Flag    | Sigma-Aldrich             | F3165      | 1µg/ml<br>0.1µg/ml | WB<br>ICC |
| P300    | Santa Cruz Biotechnology  | sc-32244   | 0.8µg/ml           | WB        |
| PCAF    | Santa Cruz Biotechnology  | sc-13124   | 2.2µg/ml           | WB        |
| CD45    | Abcam                     | ab10558    | 10µg/ml            | IF        |
| CD68    | Bio-Rad                   | MCA1957    | 10µg/ml            | IF        |
| TER119  | Invitrogen                | 14-5921-82 | 5µg/ml             | IF        |
| BrdU    | Novus Biologicals         | NBP2-14890 | 3.9µg/ml           | IF        |

WB = Western Blotting, ChIP = Chromatin Immunoprecipitation, FC = Flow Cytometry, ICC = Immunocytochemistry, IF = Immunofluorescence staining (mouse samples). \*Note that at the time of experimentation, the Abcam antibody ab51451 was marketed only as an anti pSMAD3 antibody. It was later marketed as anti pSMAD1/3/5.



## **SUPPLEMENTAL FIGURE LEGENDS**

**Figure S1. TGF- $\beta$ 2 + H<sub>2</sub>O<sub>2</sub> is most potent in inducing EndMT in HCAECs, and the effect of MC1568 on Class I and IIb HDACs and histone acetylation.** A-C, Change in mRNA expression of endothelial genes (Panel A - *ZO2*, *ICAM2*, *Occludin* and *eNOS*), mesenchymal genes (Panel B - *SM22 $\alpha$* , *FAP*, *Versican* and *Calponin*) and TGF- $\beta$ -associated transcription factors (Panel C - *SNAIL*, *SLUG*, *SMAD2* and *SMAD3*) in HCAECs after 5 days of TGF- $\beta$ 2  $\pm$  H<sub>2</sub>O<sub>2</sub> treatment compared with vehicle-treated controls by qRT-PCR. Graphs indicate fold-change in mRNA relative to vehicle-treated controls, n=4-8. D and E, mRNA expression of Class I and IIb HDACs in HCAECs after 5-day EndMT induction  $\pm$  MC1568 compared with untreated controls, as analyzed by qRT-PCR, n=4-5. F and G, Representative western blots and densitometry measurements of H3K9ac, H3K9me3, H3K27ac, H3K27me3 in HCAECs during 5-day EndMT  $\pm$  MC1568 compared with vehicle-treated controls, n=6. \* $p \leq 0.05$ , \*\* $p \leq 0.01$ , \*\*\* $p \leq 0.001$ . Analyses performed using one-way ANOVA in A-E and two-way ANOVA in F-G.

**Figure S2. Cellular localization of HDAC9, and the effect of EndMT  $\pm$  MC1568 on HATs, FAP protein expression and the regulation of histone acetylation.** A, Cell fractionation followed by western blotting and densitometry analysis for HDAC9 in HCAECs after EndMT  $\pm$  MC1568. GAPDH was used to normalize cytoplasmic fraction loading, pan-histone 3 was used to normalize nuclear fraction loading. "C" stands for control; n=3. B, Protein expression and densitometry analysis of histone acetyltransferases P300 and PCAF in HCAECs, n=4-5. C, Flow cytometry showing the percentage of FAP<sup>+</sup> HCAECs after 5-day EndMT induction  $\pm$  MC1568 compared with untreated controls, n=4. D-E, ChIP qRT-PCR analysis representing the % input detected by qRT-PCR of *ZO2*, *ICAM2* and *FAP* promoter DNA following ChIP for H3K27ac and H3K9ac respectively, n=4. All ChIP-qPCR results were normalized to appropriate IgG isotype controls which were present in every ChIP experiment and which resulted in an expected IgG value below 0.1. \* $p \leq 0.05$ , \*\* $p \leq 0.01$ , and \*\*\* $p \leq 0.001$ . Analyses performed using one-way ANOVA in A, D and E, and two-way ANOVA in B-C.

**Figure S3. MC1568 prevents HDAC9 expression and changes in mesenchymal genes in an alternate model of EndMT using TGF- $\beta$ 2 + IL-1 $\beta$  treatment in HUVECs.** A, qRT-PCR analysis of *HDAC9* gene expression in HUVECs after 7 days of TGF- $\beta$ 2 + IL-1 $\beta$  treatment  $\pm$  MC1568 compared with untreated controls. B, Gene expression of *SLUG*, C-E, endothelial genes, *CD31*, *eNOS* and *CDH5* and; F-H, mesenchymal genes  *$\alpha$ SMA*, *COL1A1* and *SM22 $\alpha$*  in HUVECs. Graphs indicate fold-change in mRNA relative to vehicle-treated controls, n=3-9 independent experiments. \* $p \leq 0.05$ , \*\* $p \leq 0.01$ , \*\*\* $p \leq 0.001$  and \*\*\*\* $p \leq 0.0001$ . All analyses performed using two-way ANOVA.

**Figure S4. In vitro class IIa HDAC inhibition attenuates EndMT-associated changes in endothelial cell function in HCAECs.** A, Crystal violet staining showing changes in cell numbers and density after 5 days of EndMT induction (with TGF- $\beta$ 2 + H<sub>2</sub>O<sub>2</sub>) in HCAECs  $\pm$  MC1568. Scale bars=100 $\mu$ m. B, Following 24h of EndMT induction, HCAECs were incubated for a further 10h with BrdU, followed by spectrophotometric quantification. Proliferation data are represented as fold-change normalized to vehicle-treated control cells, n=8. C, Representative images and quantification of TUNEL assay on HUVECs  $\pm$  EndMT induction, n=3. Scale bars=30 $\mu$ m. D, Tubule formation assessed after EndMT induction in HCAECs by plating cells onto Matrigel and incubating for another 4h before assessment. Tubule branch points were imaged and quantified, n=4. Scale bars=100 $\mu$ m. E, Contraction assay showing changes in relative unoccupied area (normalized to a completely unoccupied well) for HCAECs after 5-days EndMT induction  $\pm$  MC1568, n=4. \* $p \leq 0.05$ , \*\* $p \leq 0.01$ , \*\*\* $p \leq 0.001$  and \*\*\*\* $p \leq 0.0001$ . All analyses performed using two-way ANOVA.

**Figure S5. Exogenous HDAC9 overexpression promotes EndMT.** A, mRNA expression of HDAC9, mesenchymal and endothelial genes after exogenous overexpression of HDAC9 following transfection with a full-length HDAC9 expressing plasmid or empty plasmid as control, n=4. B, Western blotting for Flag and HDAC9 confirming expression of exogenous HDAC9 24h and 48h after transfection. GAPDH was used as loading control. C, Immunocytochemistry for Flag showing predominantly cytoplasmic and peri-nuclear protein expression of exogenous HDAC9 in HUVECs after transfection with a Flag-tagged, HDAC9 overexpressing plasmid (pCMV-3tag6-HDAC9). Scale bars=50µm. D, Representative western blots and densitometry measurements of endothelial proteins (ZO2, ICAM2) in HUVECs transfected with Flag-tagged HDAC9 overexpressing (pCMV-3tag6-HDAC9) plasmid or empty plasmid ± MC1568, n=4-5. \* $p \leq 0.05$ , \*\* $p \leq 0.01$ , and \*\*\* $p \leq 0.001$ . All analyses performed using one-way ANOVA.

**Figure S6. Body weights, blood counts, lipid panels and blood pressure of Endo-Hdac9<sup>KO</sup> mice are unaltered compared to littermate controls.** Endo-Hdac9<sup>KO</sup> mice were compared with littermate controls (Hdac9<sup>fl/fl</sup>). All mice underwent an identical course of tamoxifen injections and induction of atherosclerosis. Blood was drawn for these comparisons immediately after weighing, at the time of sacrifice and tissue harvest. A, Comparison of final body weight for male and female mice showing no difference between Endo-Hdac9<sup>KO</sup> mice and controls. B, Comparison of plasma lipid levels showing no difference between Endo-Hdac9<sup>KO</sup> mice and controls. TG, triglycerides; HDLc, high density lipoprotein cholesterol; LDLc, low density lipoprotein cholesterol. C-D, Comparison of complete blood counts showing no difference between Endo-Hdac9<sup>KO</sup> mice and controls (n=6 mice per group). RBC, red blood cells; WBC, white blood cells; Mono, monocytes; Lympho, lymphocytes; Neutro, neutrophils. E, Systolic and diastolic blood pressure measured with CODA<sup>®</sup> system at 8-, 16-, and 24- weeks of age. F, Representative immunofluorescence images of aortic root sections with staining of CD68<sup>+</sup> cells (red), with nuclei counterstained using DAPI (blue). Graph shows analysis of the area occupied by CD68<sup>+</sup> cells as a percentage of total plaque area. Scale bars=100µm. Unless otherwise stated, n=10 controls versus n=9 Endo-Hdac9<sup>KO</sup> mice. \* $p \leq 0.05$ . All analyses performed using unpaired Student's t-test except the following where Mann-Whitney test was used: both analyses in panel A; LDL-c and HDL-c in panel B; systolic and diastolic blood pressure at week 8 in panel E; and diastolic blood pressure at week 24 in panel E.

**Figure S7. Endothelial-specific Hdac9 knockout reduces EndMT in different aortic areas in vivo.** All comparisons in this figure were generated using sections from the ascending aorta and aortic arch from Endo-Hdac9<sup>KO</sup> mice versus littermate controls, and all mice received tamoxifen. This figure corresponds to Figure 5 where equivalent images and data are presented from the aortic root. A-B, Representative immunofluorescence staining images for SM22α (green), CD31 (red) and DAPI stained nuclei (blue), quantification of SM22α<sup>+</sup>CD31<sup>+</sup> co-positive cells over total CD31<sup>+</sup> cells, and the total number of CD31<sup>+</sup> cells per image. C-D, Representative immunofluorescence staining images for αSMA (green), CD31 (red) and DAPI stained nuclei (blue), and quantification of co-positive cells over total CD31<sup>+</sup> cells and the total number of CD31<sup>+</sup> cells per image. E-F, Representative immunofluorescence staining images for pSMAD2 (green), CD31 (red) and DAPI stained nuclei (blue), and quantification of co-positive cells over total CD31<sup>+</sup> cells and the total number of CD31<sup>+</sup> cells per image. Scale bars=50µm. n=10 controls versus n=9 Endo-Hdac9<sup>KO</sup> mice. \*\* $p \leq 0.01$ , \*\*\* $p \leq 0.001$  and \*\*\*\* $p \leq 0.0001$ . All analyses performed using unpaired Student's t-test.

**Figure S8. Endothelial-specific Hdac9 knockout reduces atherosclerosis and enhances plaque stability in vivo.** All comparisons in this figure are using Endo-Hdac9<sup>KO</sup> mice versus littermate controls, and all mice received tamoxifen. This figure corresponds to Figure 6, B–D,

where equivalent images and data are presented from the aortic root. A-B, Representative images with staining using Oil Red O, with quantification of total plaque area and plaque lipid content (red stained area as a percentage of total plaque area) for the ascending aorta and aortic arch. C-D, Representative images of ascending aorta and aortic arch sections using Von Kossa stain (black represents calcification), with quantification of calcification. E-F, Representative ascending aorta and aortic arch images stained with Masson's trichrome with quantification of collagen content, fibrous cap thickness, and presence or non-presence of necrotic core. n=10 controls versus n=9 Endo-*Hdac9*<sup>KO</sup> mice for all panels. \* $p \leq 0.05$  and \*\*\* $p \leq 0.001$ . All analyses performed using unpaired Student's t-test except the following where Mann-Whitney test was used: plaque area in panel A; calcification in panel D; and collagen content in panels E and F. In addition, presence or non-presence of necrotic core in panels E and F was analyzed using Fisher's exact test.

**Figure S9. Endothelial-specific *Hdac9* knockout reduces atherosclerosis and enhances plaque stability in vivo.** As per Figure S8, all comparisons in this figure are using Endo-*Hdac9*<sup>KO</sup> mice versus littermate controls, and all mice received tamoxifen. This figure corresponds to Figure 6E and 6F, where equivalent images and data are presented from the aortic root. A-B, Representative immunofluorescence staining images in ascending aorta and aortic arch plaques for TER119 (red – an erythrocyte marker) and DAPI stained nuclei (blue), and quantification. C-D, Representative immunofluorescence staining images in ascending aorta and aortic arch plaques for BrdU (green), CD31 (red) and DAPI stained nuclei (blue) in the endothelial and sub-endothelial layers, and quantification. Scale bars=50 $\mu$ m. n=10 controls versus n=9 Endo-*Hdac9*<sup>KO</sup> mice for all panels. \*\* $p \leq 0.01$  and \*\*\*\* $p \leq 0.0001$ . All analyses performed using unpaired Student's t-test except both analyses in panels A and B where Mann-Whitney test was used.

**Figure S10. Effects of systemic MC1568 administration on EndMT and mouse body weight, lipid panel, blood counts and EndMT in atherosclerotic plaques.** *ApoE* null mice were fed HFD for 18 weeks and received MC1568 or vehicle alone via twice-weekly intraperitoneal injections for the last 8 weeks of HFD. This figure corresponds to Figure 7. Blood was drawn for these comparisons immediately after weighing, at the time of sacrifice and tissue harvest. A, Comparison of final body weight for male and female mice showing no difference between MC1568 (n=9) and vehicle (n=8) treated mice. B, Comparison of plasma lipid levels showing no difference between MC1568 (n=9) and vehicle (n=8) treated mice; TG, triglycerides; HDLc, high density lipoprotein cholesterol; LDLc, low density lipoprotein cholesterol. C-D, Comparison of complete blood counts including red blood cells (RBC), platelets, white blood cells (WBC), monocytes (Mono), lymphocytes (Lympho) and neutrophils (Neutro) in vehicle (n=8) and MC1568 (n=5) treated mice. E-F, Representative images of immunofluorescence staining of ascending aorta and aortic arch sections for SM22 $\alpha$  (green), CD31 (red) and DAPI stained nuclei (blue), quantification of SM22 $\alpha$ <sup>+</sup>CD31<sup>+</sup> co-stained cells over total CD31<sup>+</sup> cells, and the total number of CD31<sup>+</sup> cells per image. Scale bars=50 $\mu$ m. n=8 each for groups of vehicle and MC1568 injected mice. \* $p \leq 0.05$ , \*\* $p \leq 0.01$  and \*\*\* $p \leq 0.001$ . All analyses performed using unpaired Student's t-test except the following where Mann-Whitney test was used: platelets in panel C, lymphocytes in panel D, and CD31<sup>+</sup> cells per image in panel E.

**Figure S11. Plaque leukocyte numbers and lipid content in additional vascular beds of MC1568-administrated *ApoE*<sup>-/-</sup> mice.** *ApoE* null mice were fed HFD for 18 weeks and received MC1568 or vehicle alone via twice-weekly intraperitoneal injections for the last 8 weeks of HFD. Frozen sections from vehicle or MC1568 treated mice were stained as indicated. This figure corresponds to Figure 7. A, Representative immunofluorescence aortic root images from vehicle (n=8) or MC1568 (n=9) treated mice stained for CD45<sup>+</sup> cells (green), with nuclei counterstained using DAPI (blue). Graph represents the area of CD45<sup>+</sup> cells as a percentage of total plaque area. B, Representative immunofluorescence aortic root images from vehicle (n=8) or MC1568 (n=9)

treated mice of CD68<sup>+</sup> cells (red), with nuclei counterstained using DAPI (blue). Graph represents the area of CD68<sup>+</sup> cells as a percentage of total plaque area. C-D, Representative images of the ascending aorta and aortic arch from vehicle (n=8) or MC1568 (n=8) treated mice with staining using Oil Red O, with quantification of total plaque area and plaque lipid content. Scale bars: A-B=100µm; C-D=50µm. \* $p \leq 0.05$ . All analyses performed using unpaired Student's t-test.

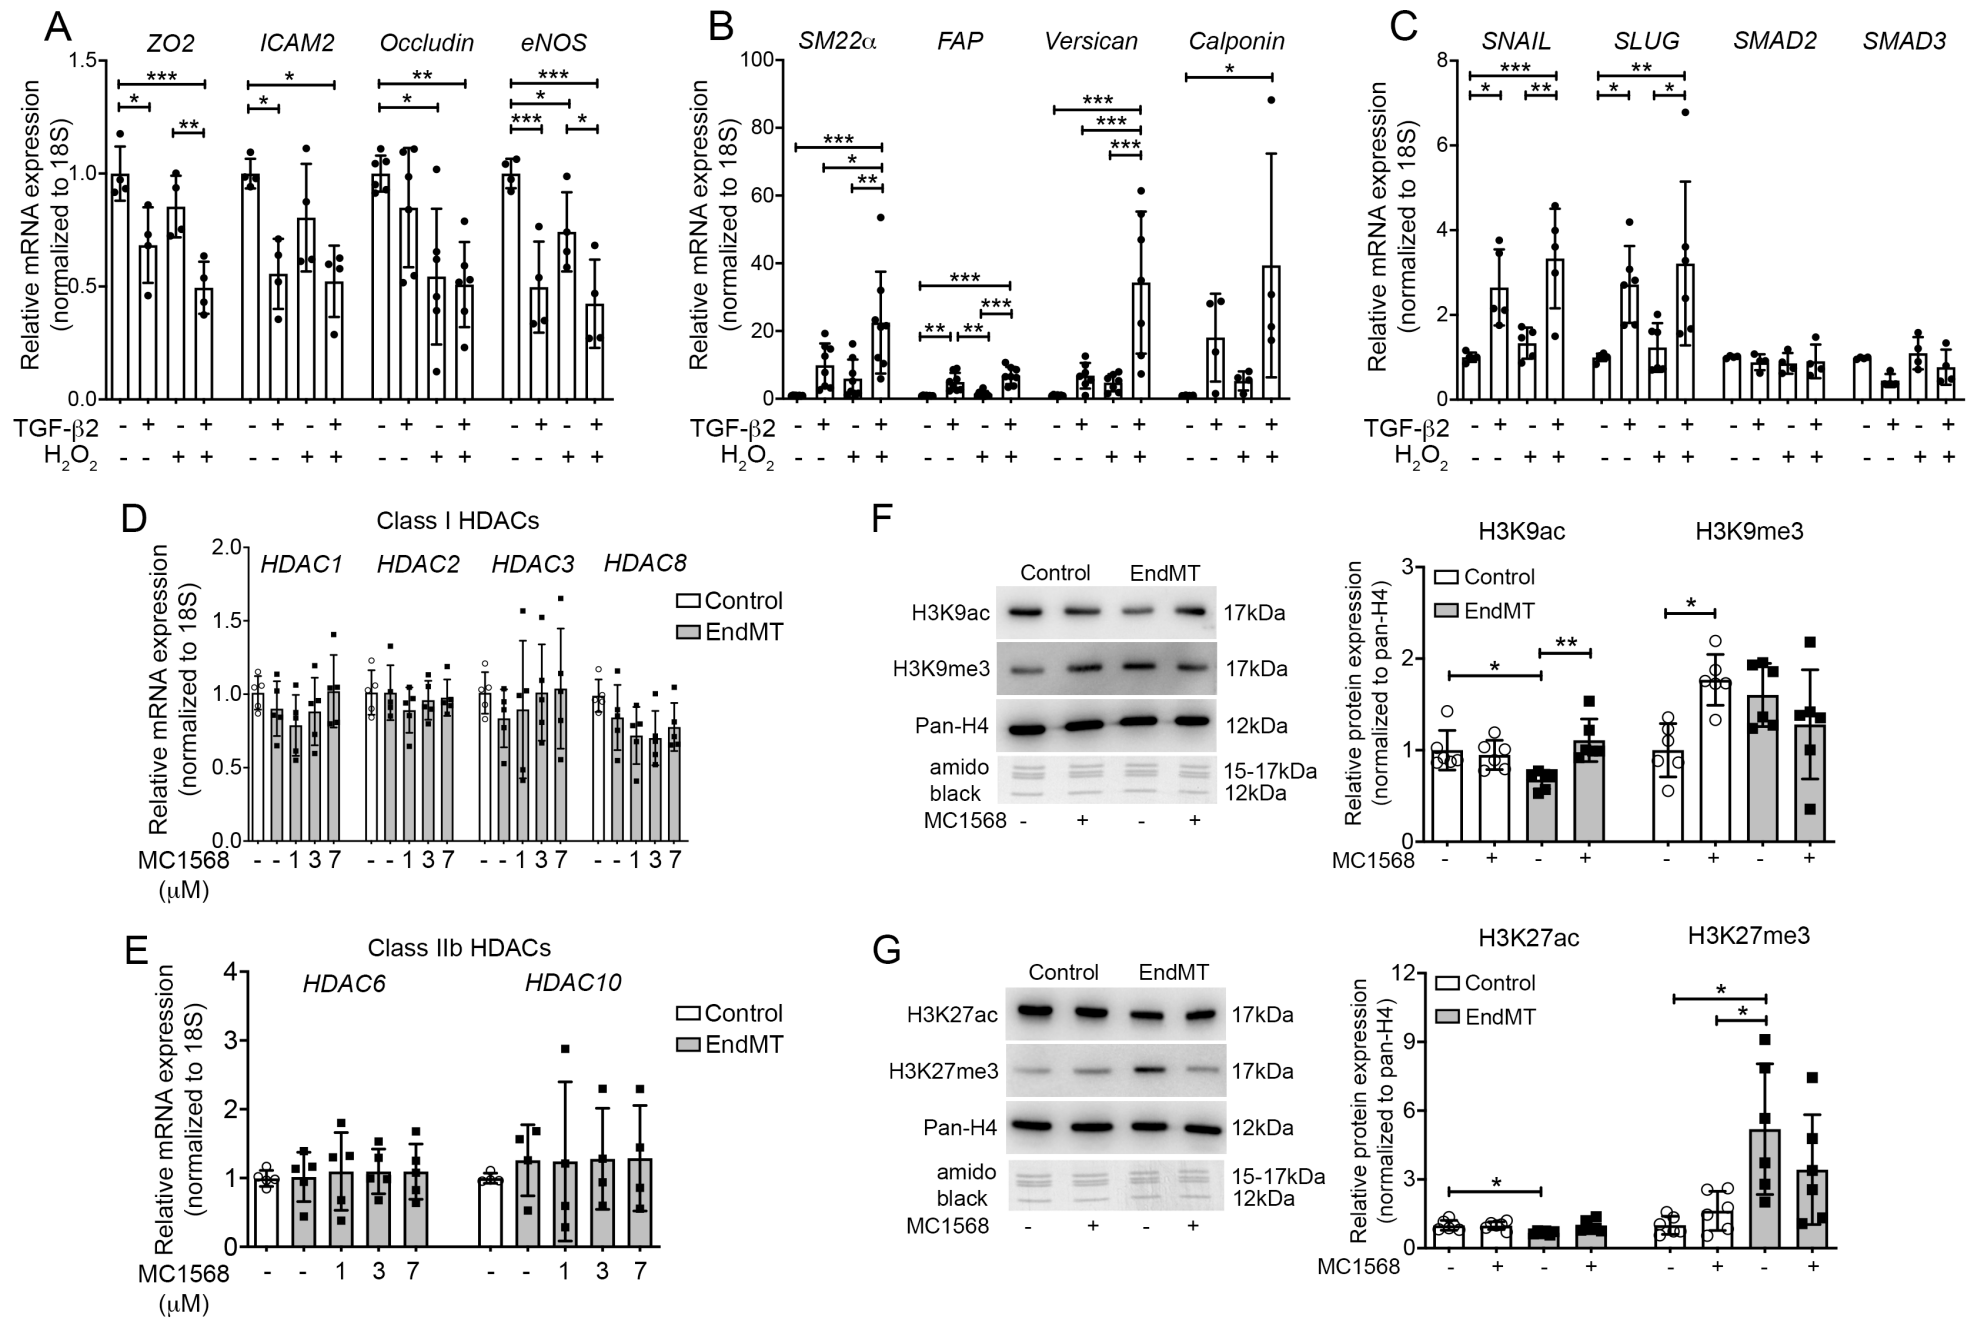

## Supplemental Figure 2

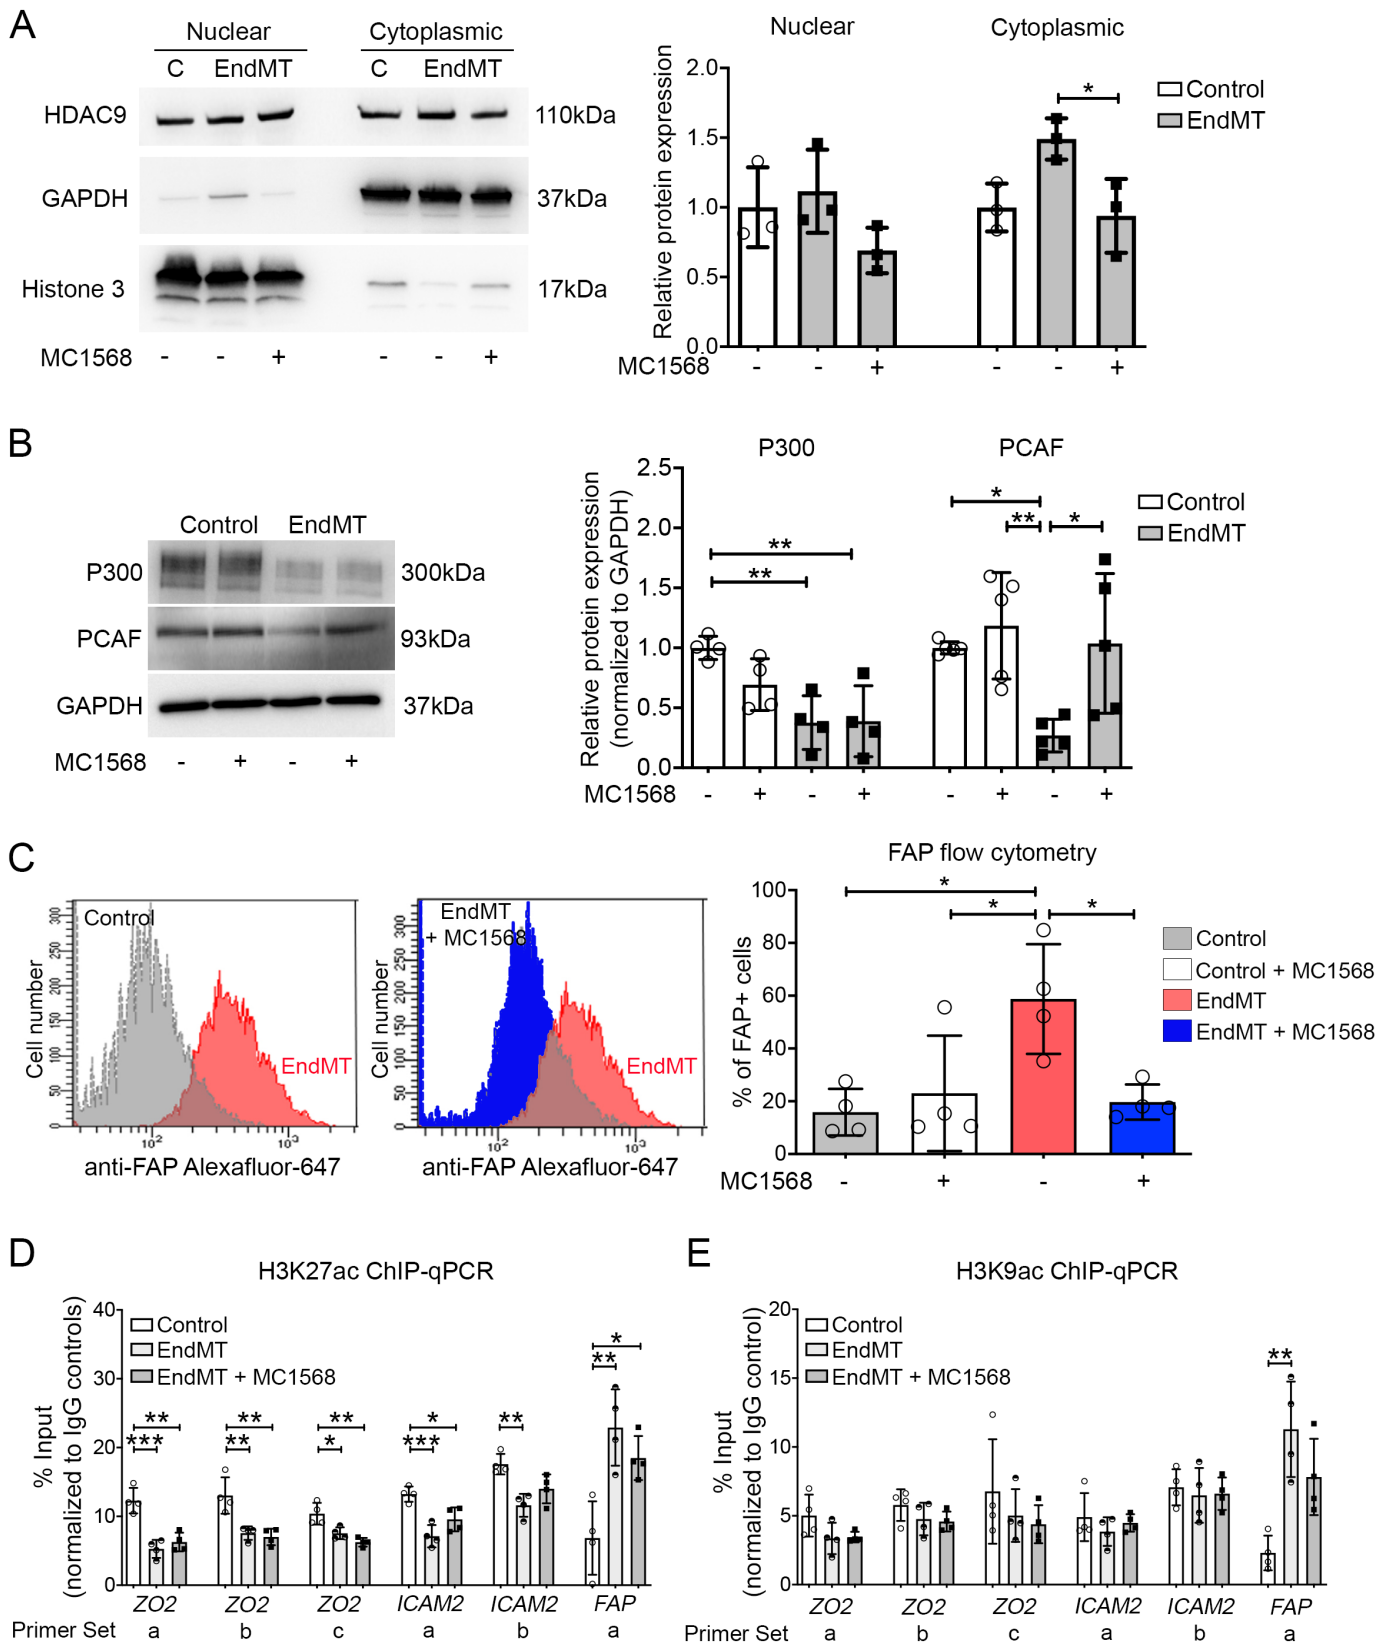

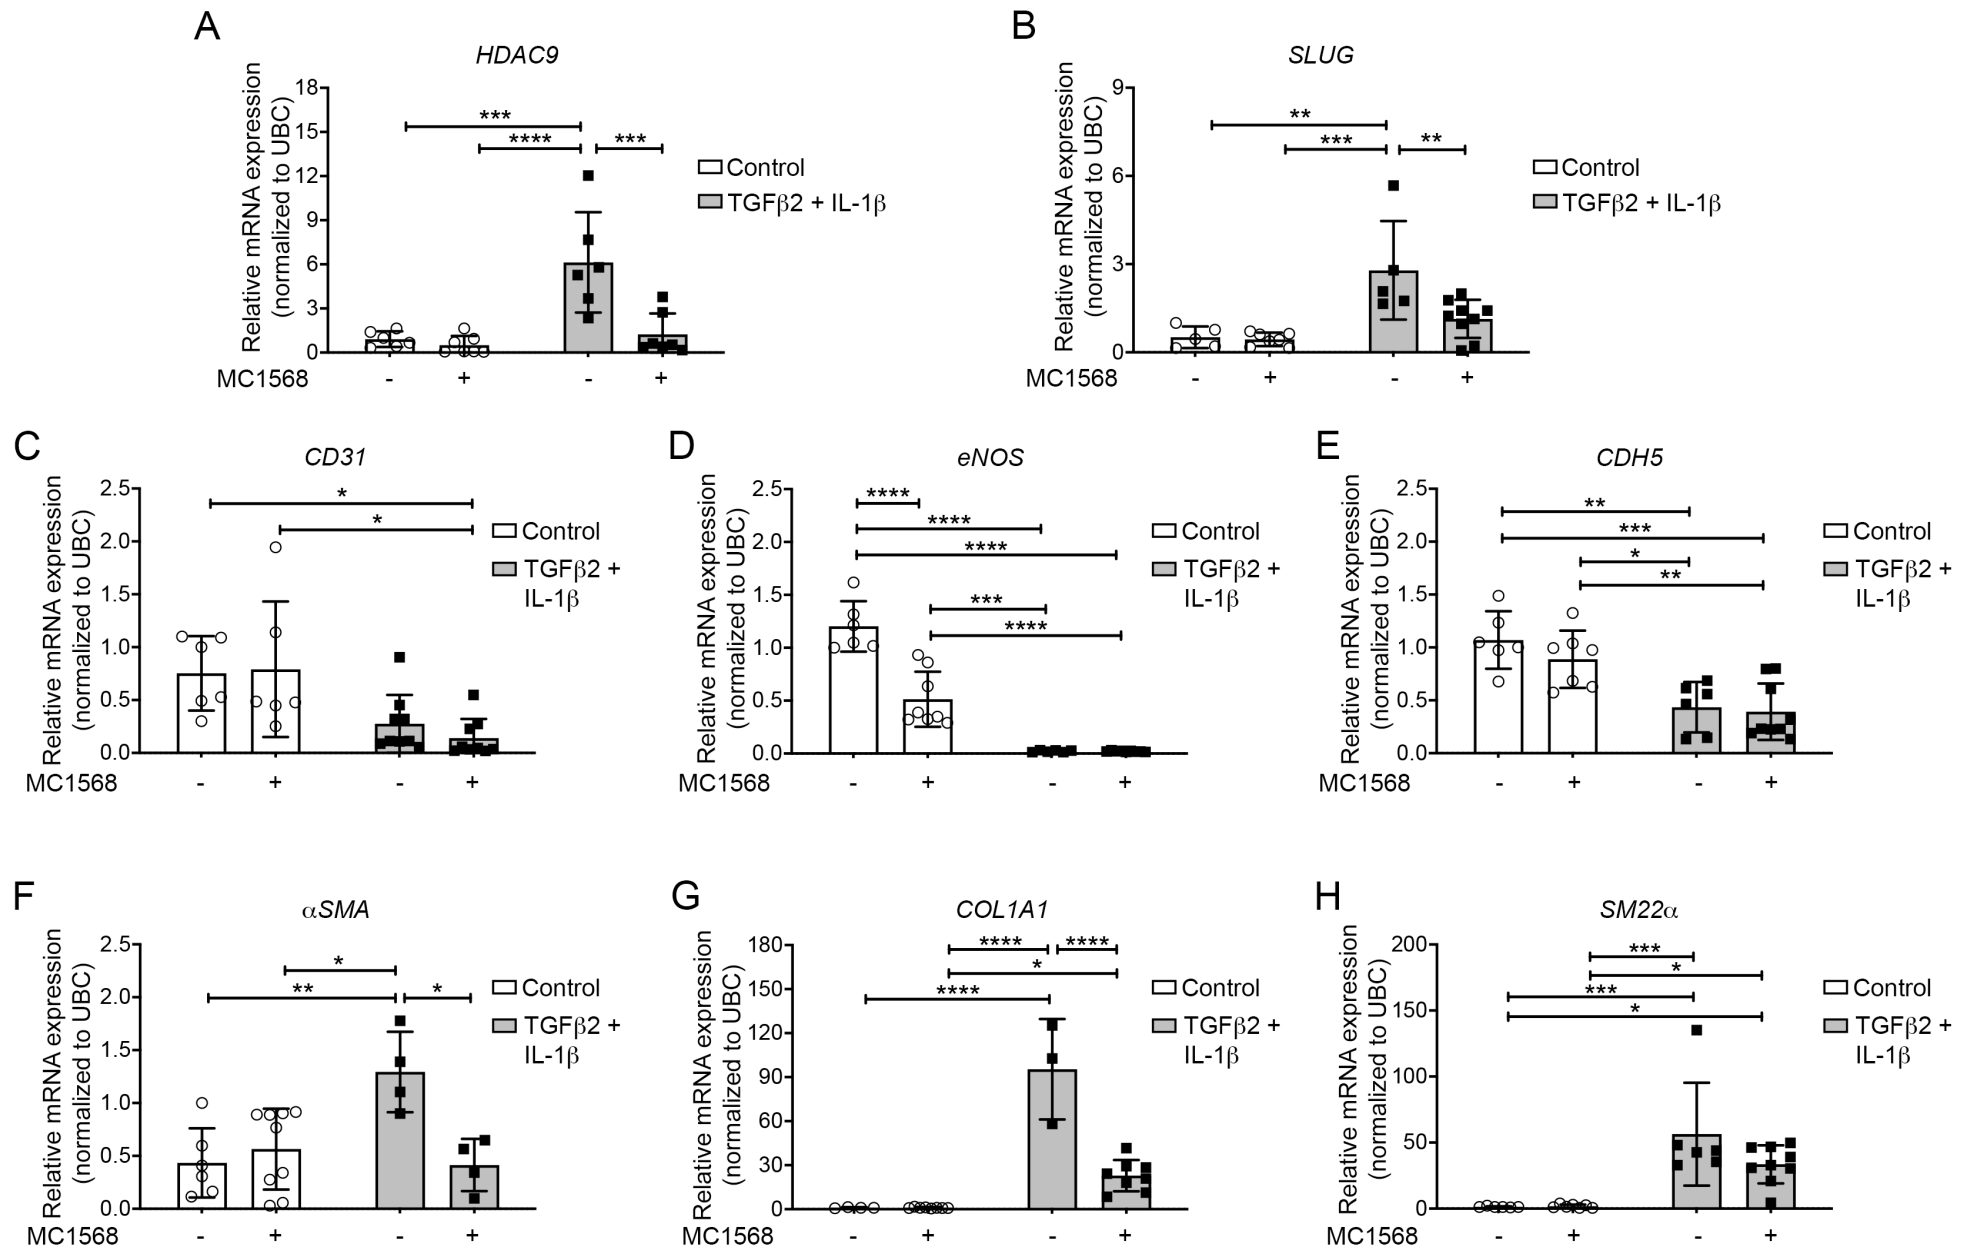

# Supplemental Figure 4

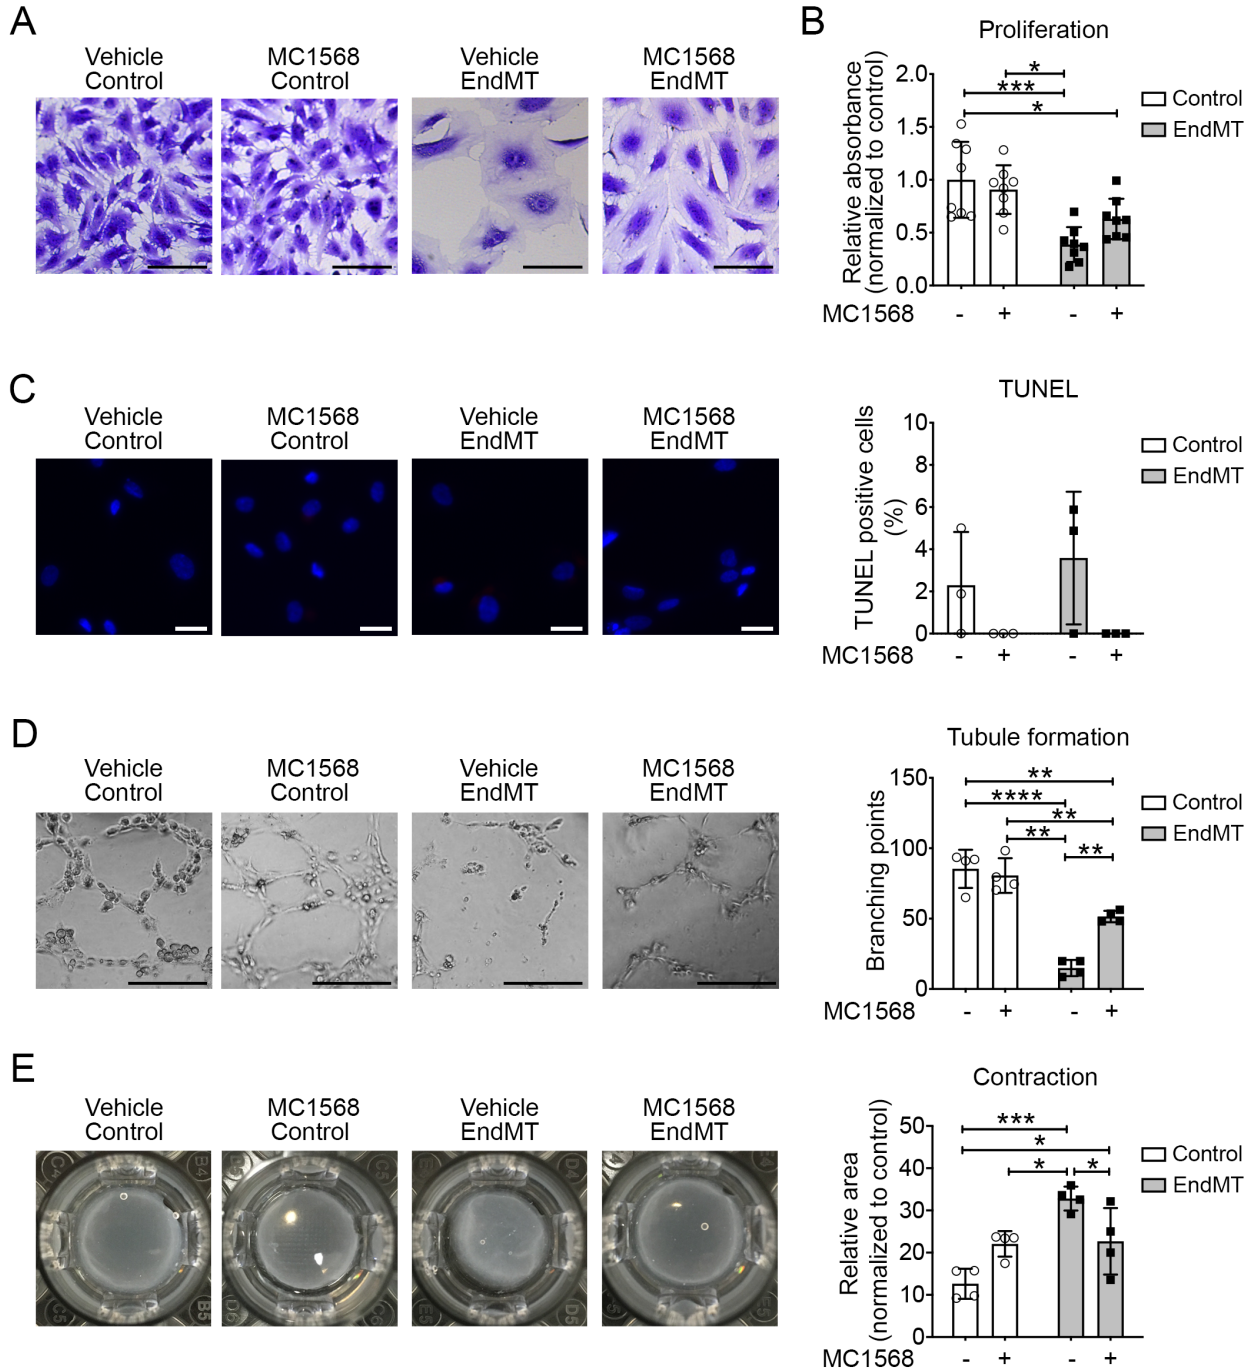



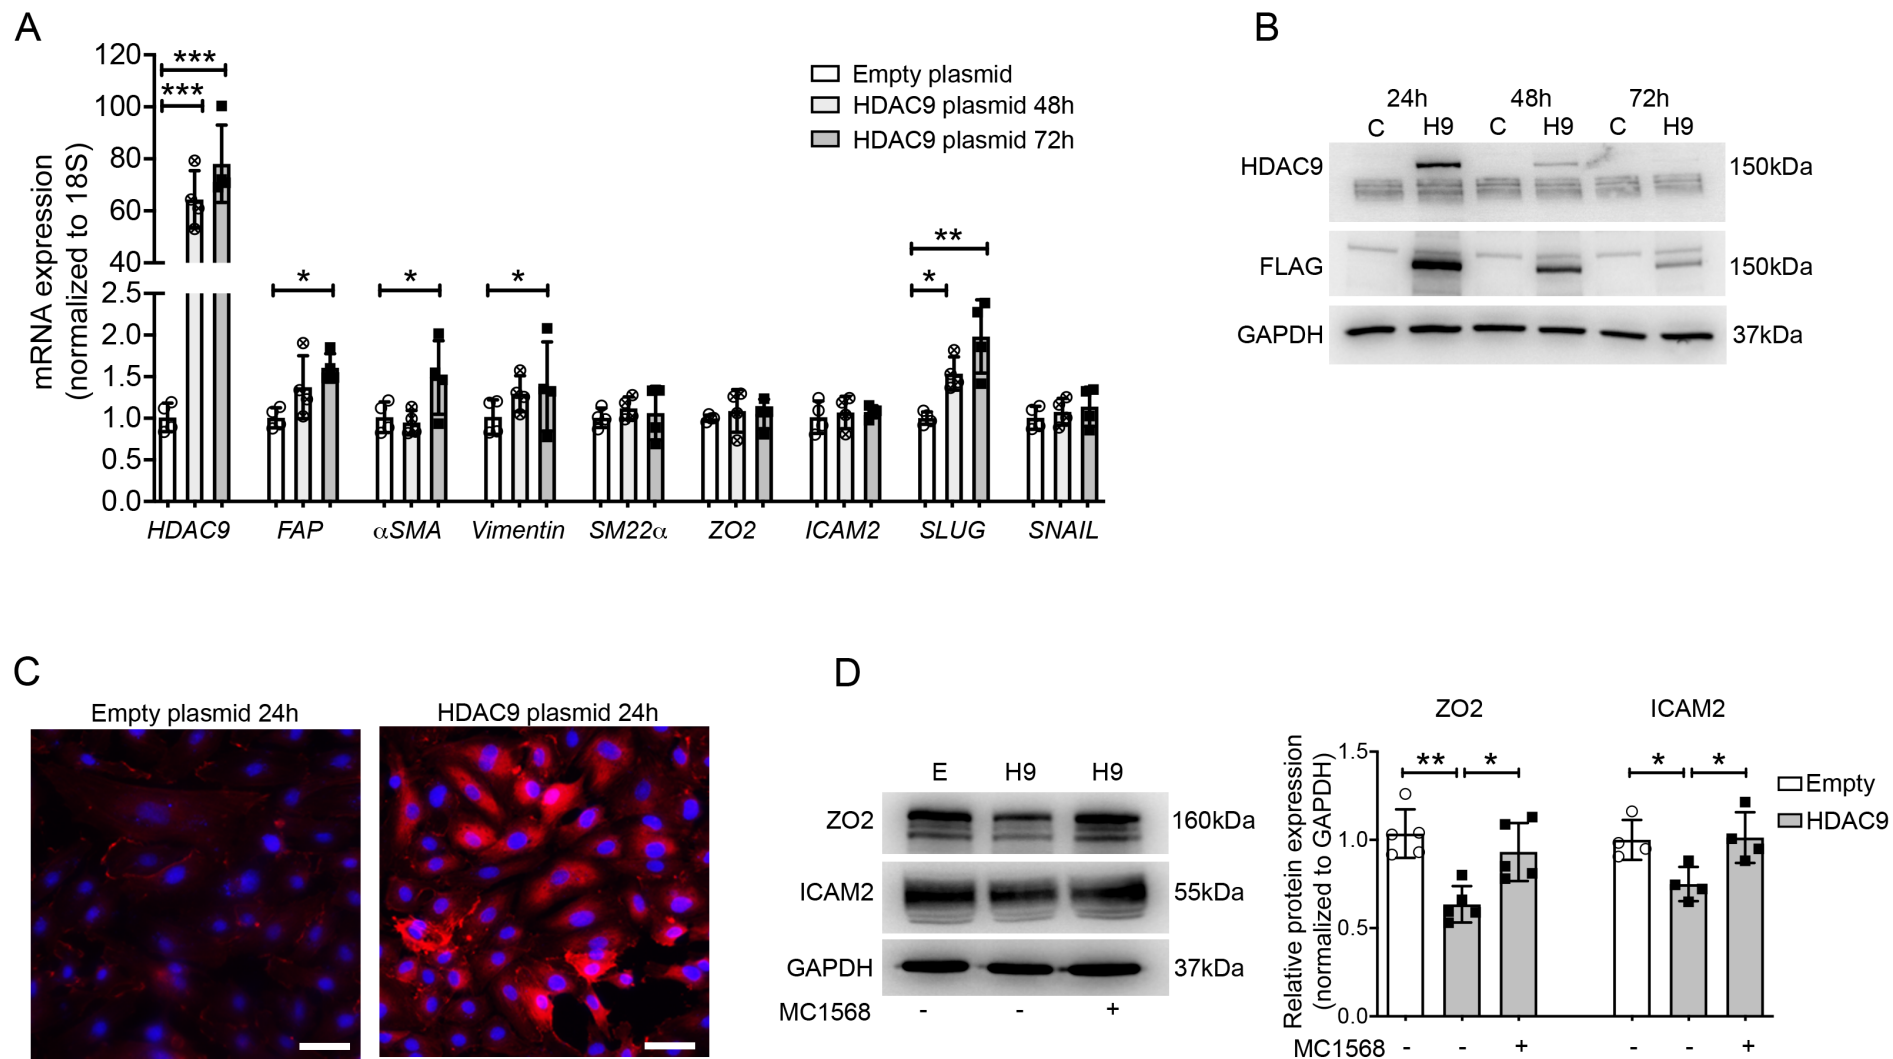

Supplemental Figure 6

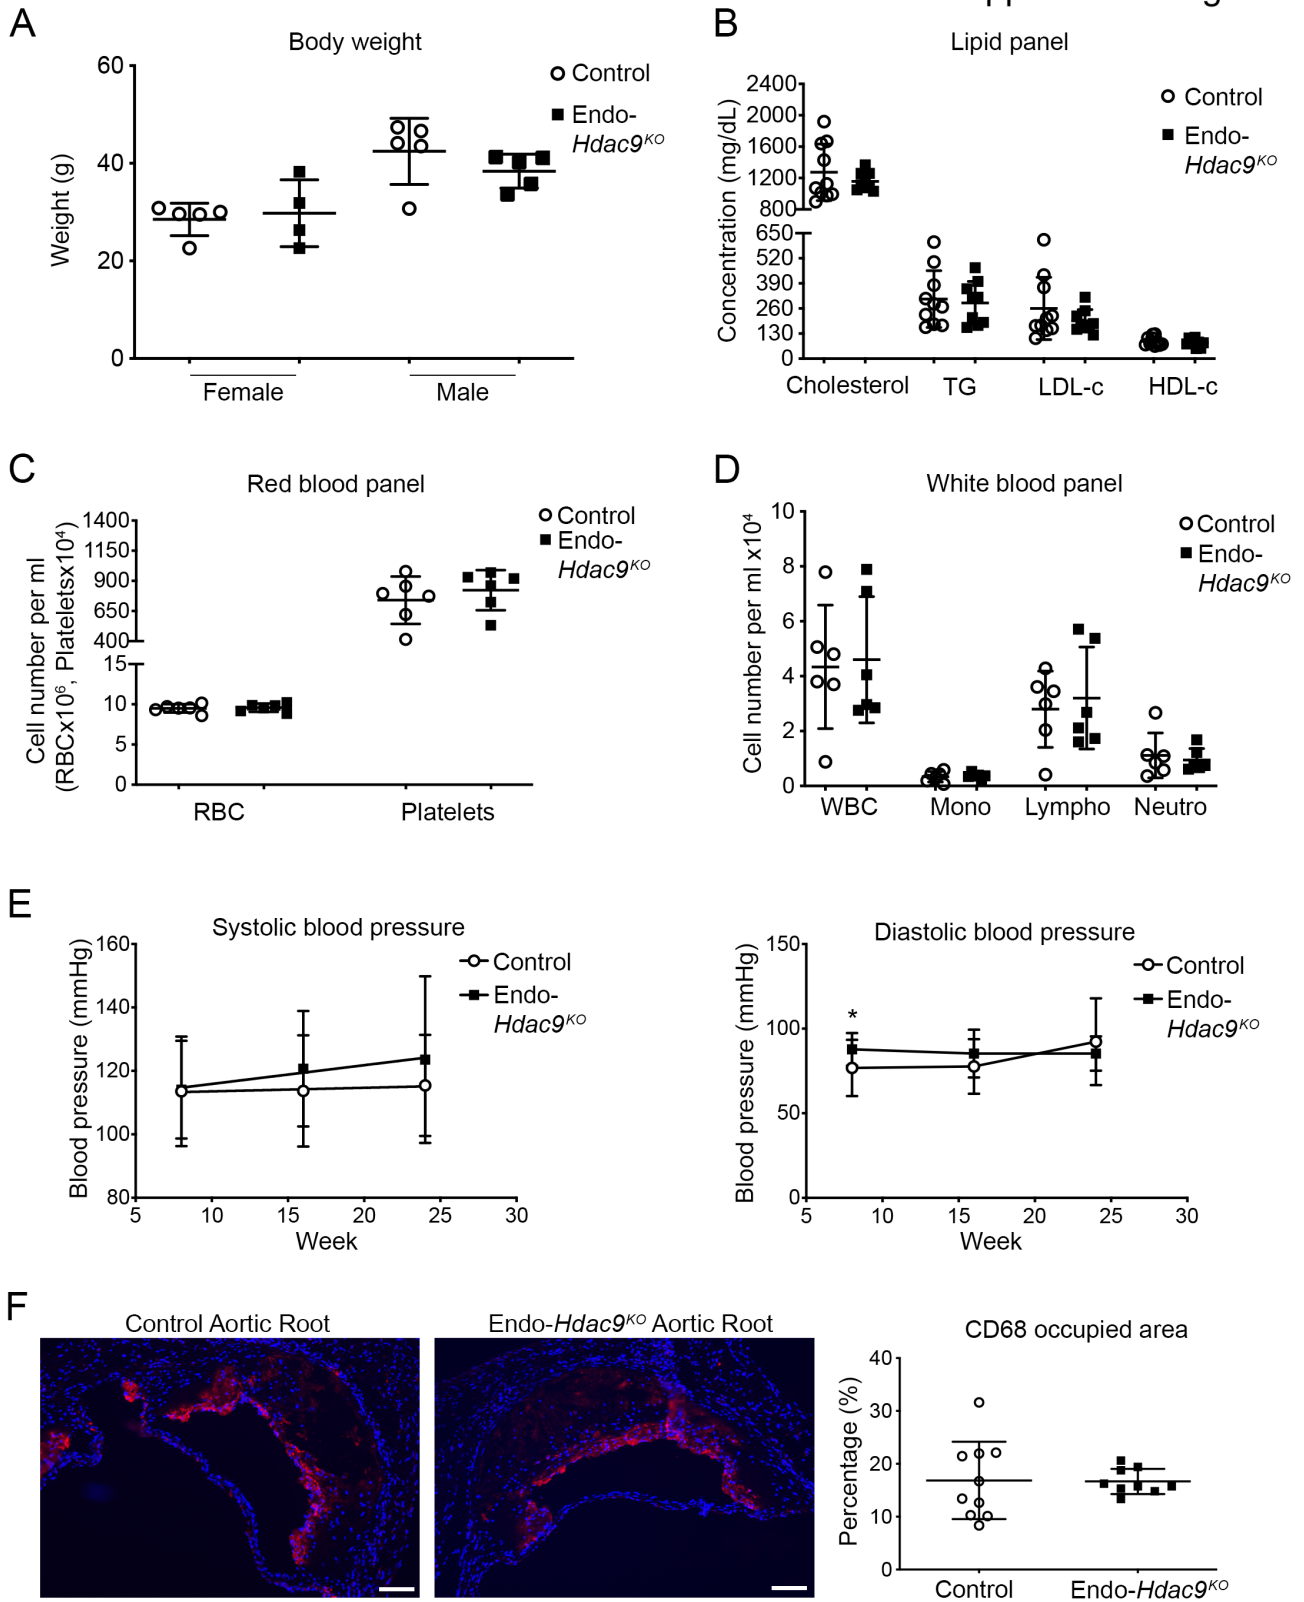

# Supplemental Figure 7

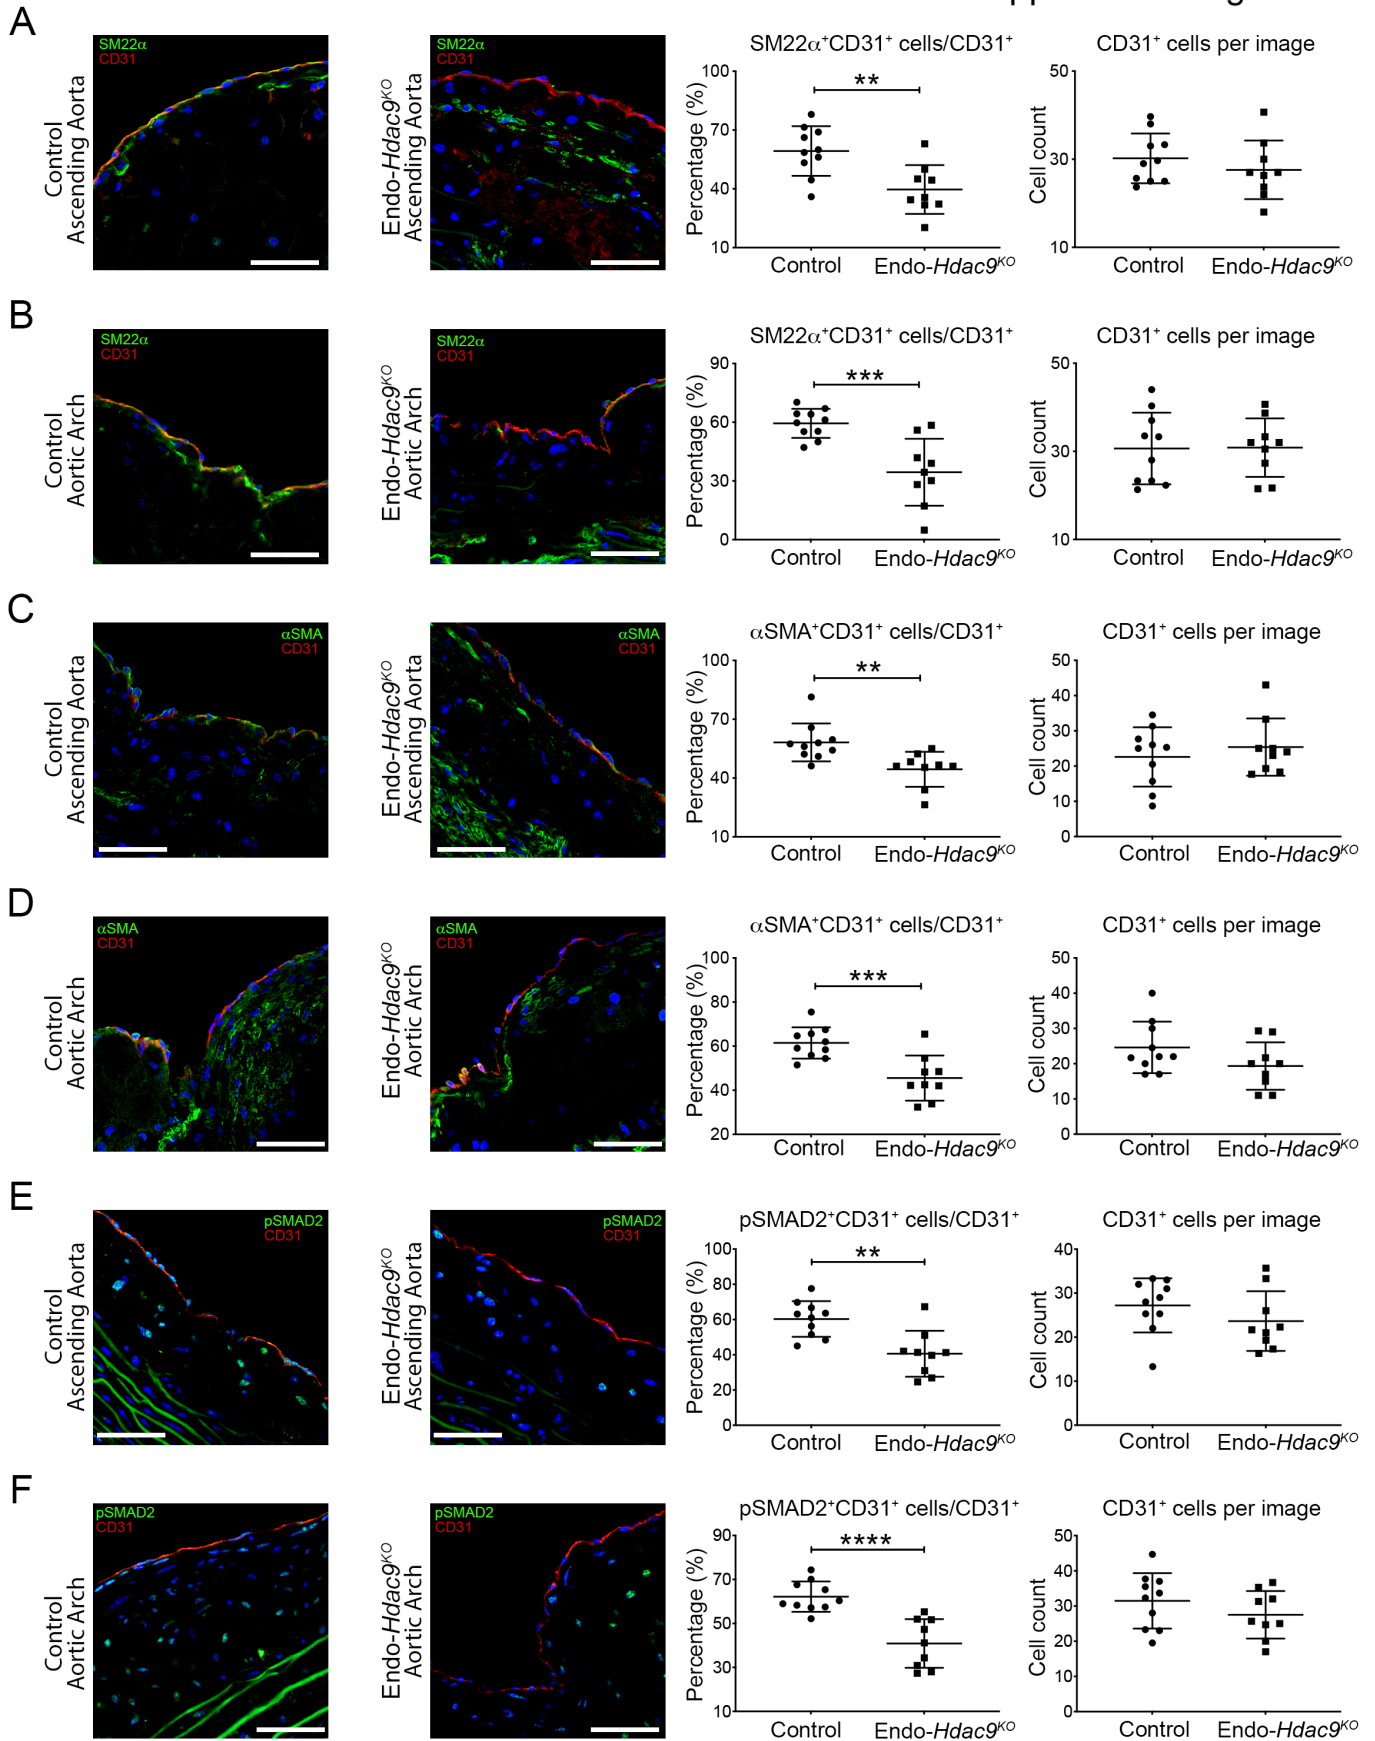

# Supplemental Figure 8

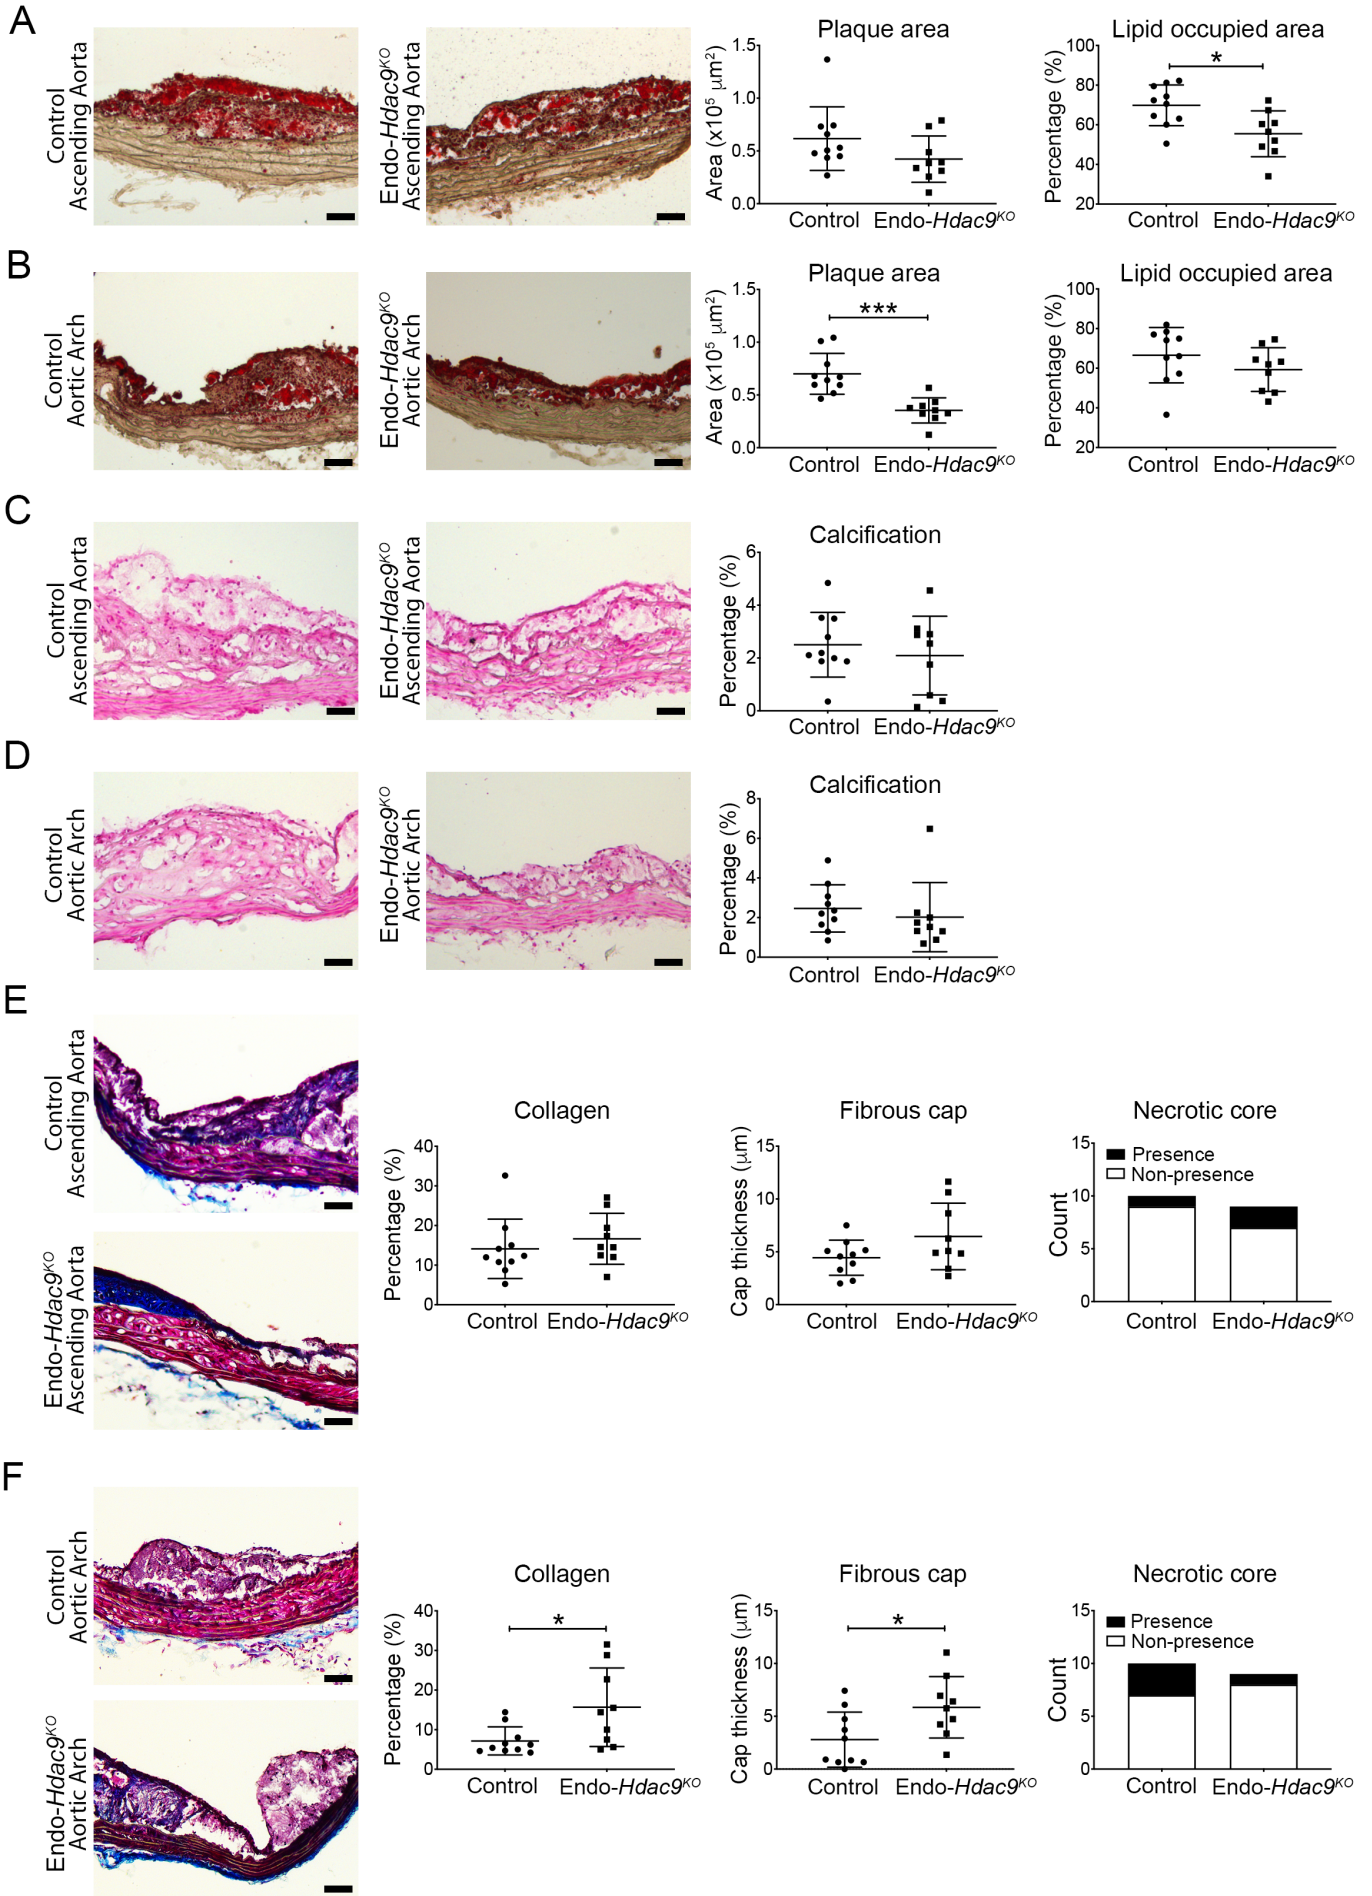

# Supplemental Figure 9

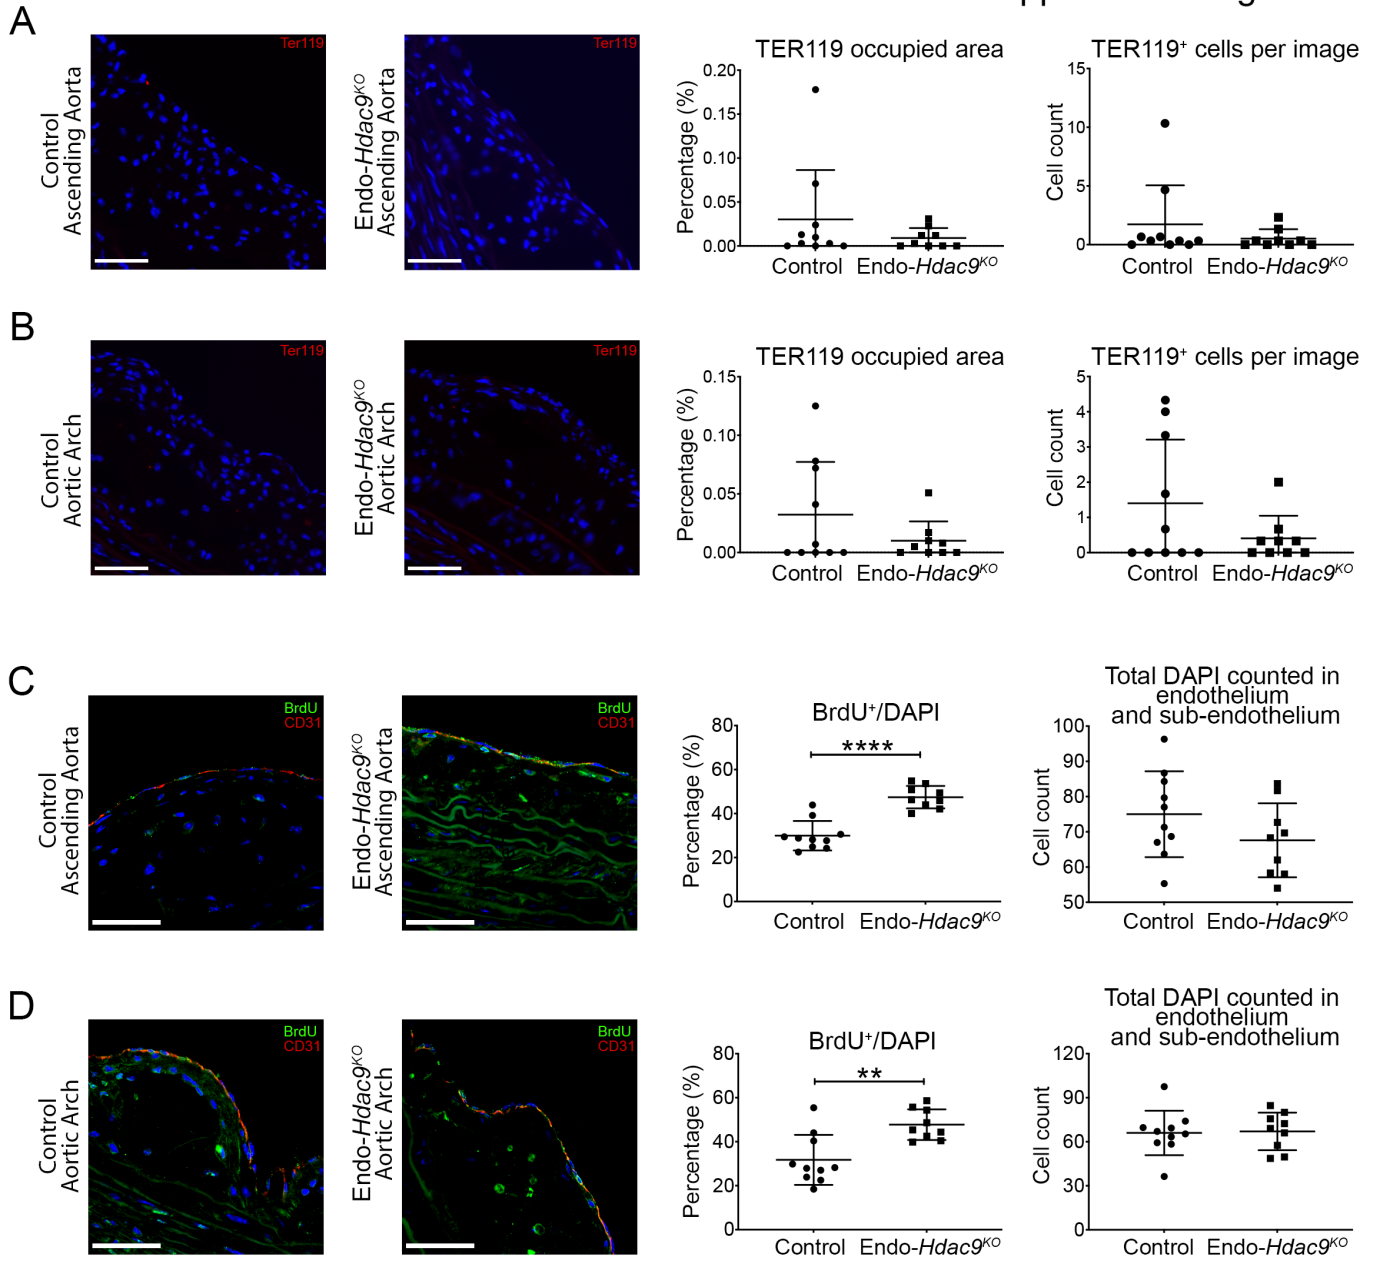

Supplemental Figure 10

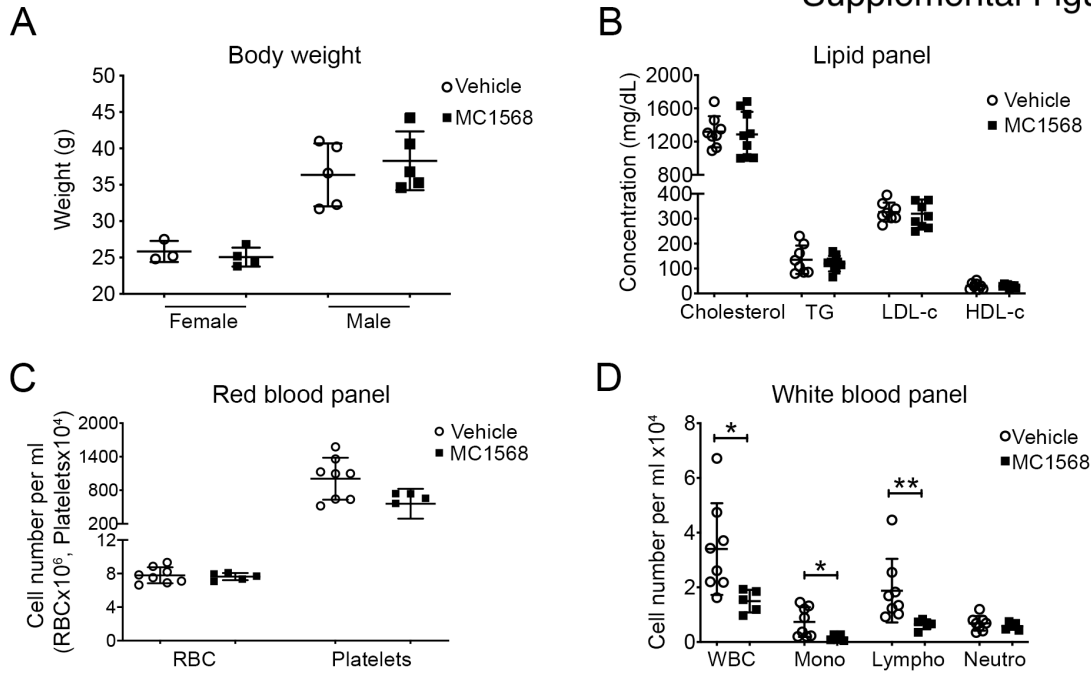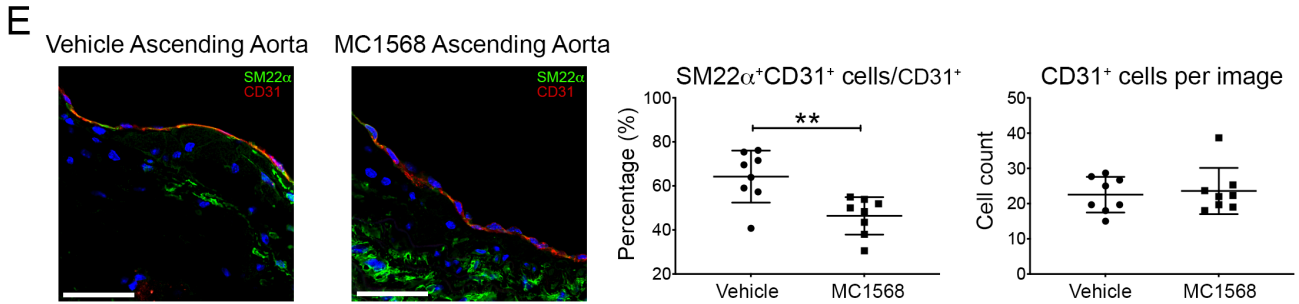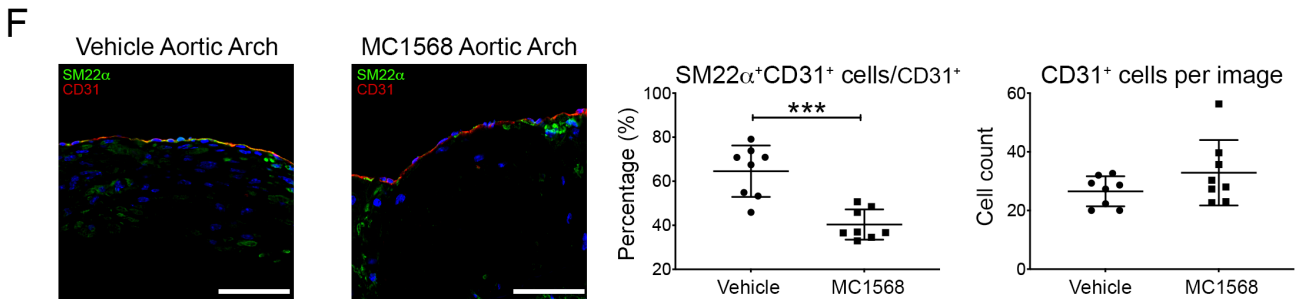

# Supplemental Figure 11

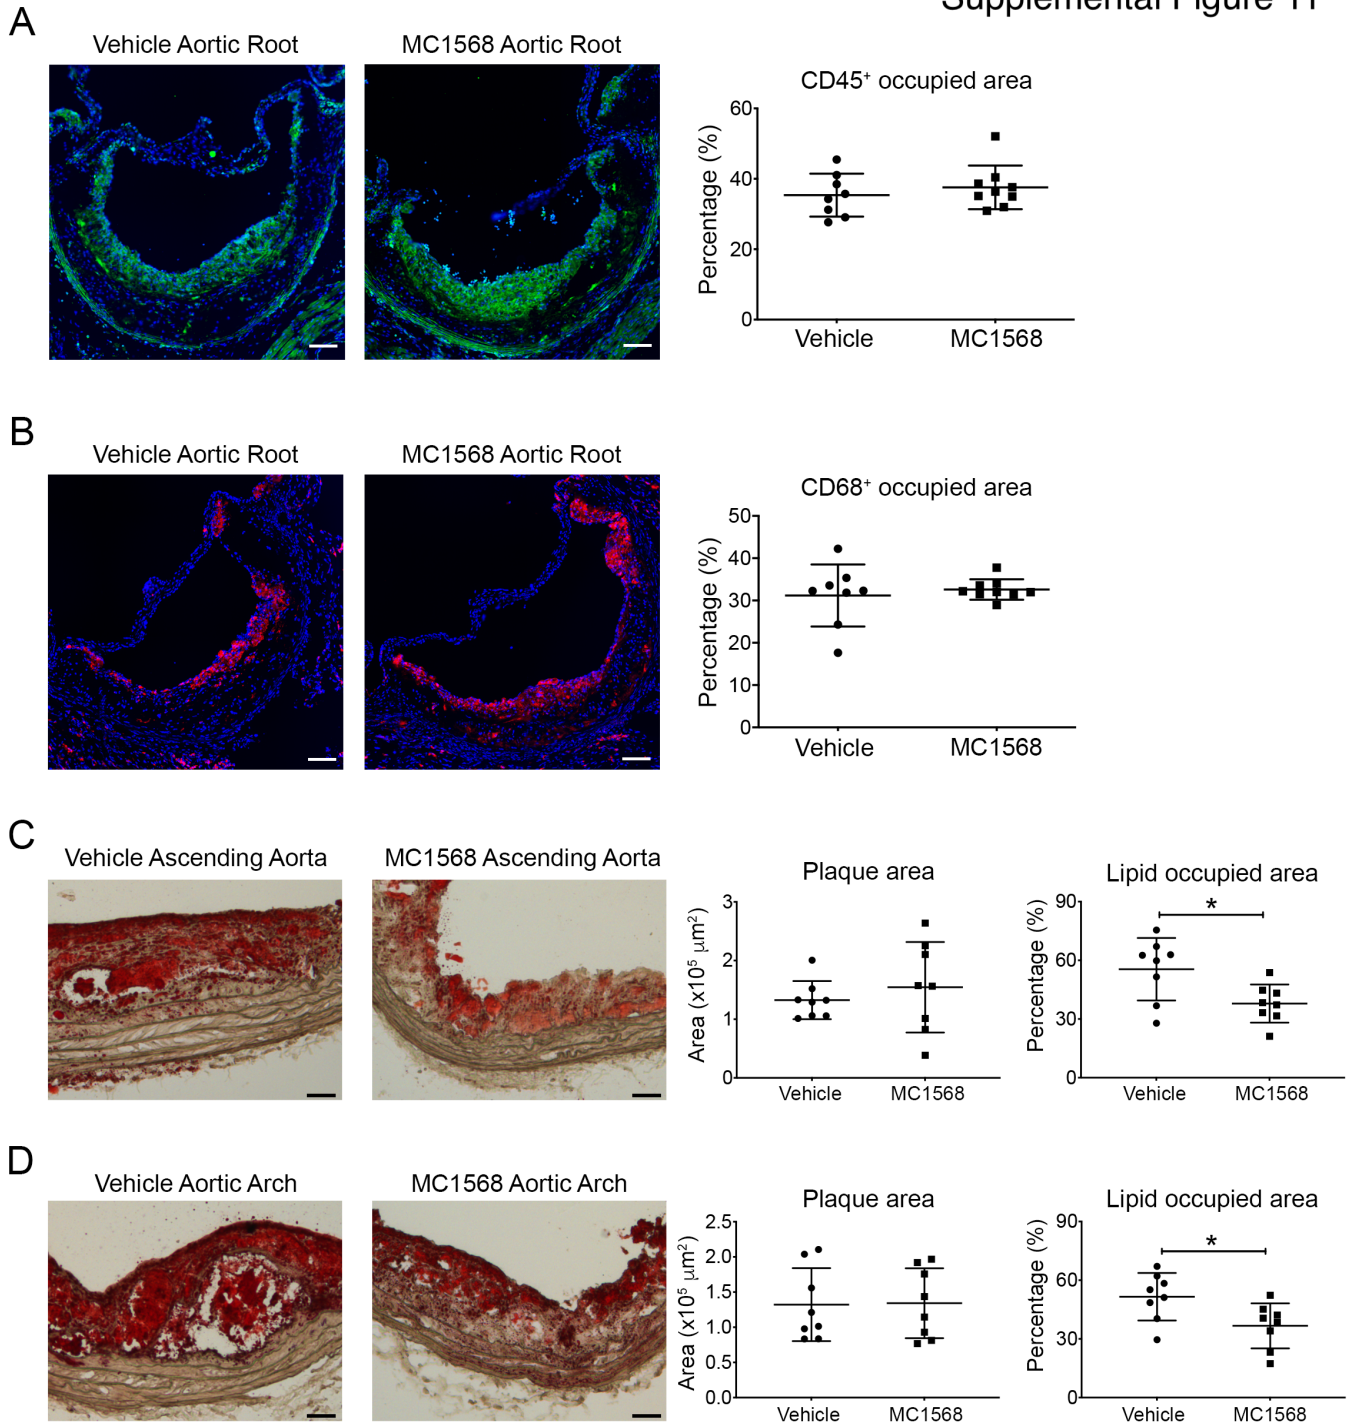

Full uncut gels



Figure 1

Figure 1A

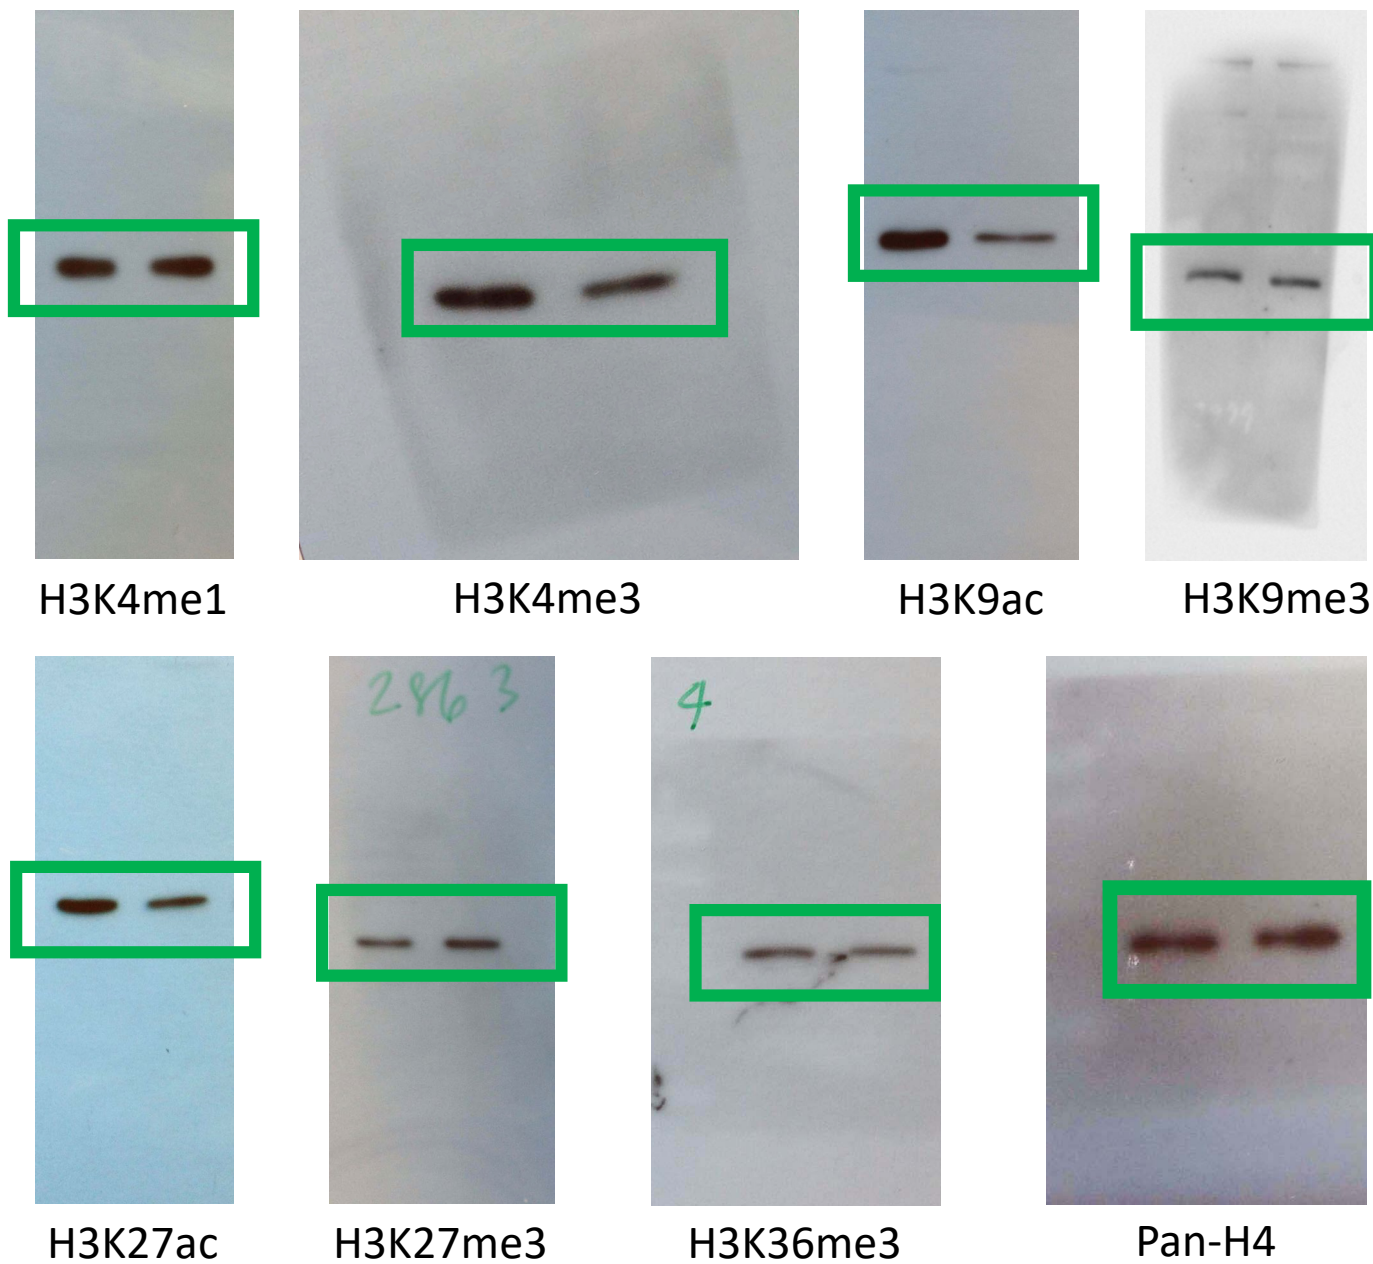

# Figure 1

## Figure 1E

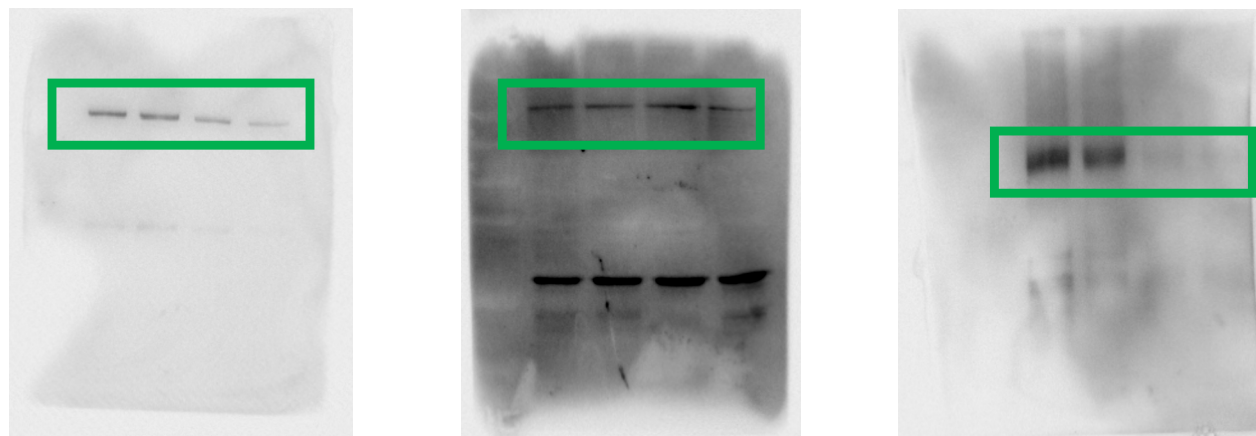

HDAC4

HDAC5

HDAC7

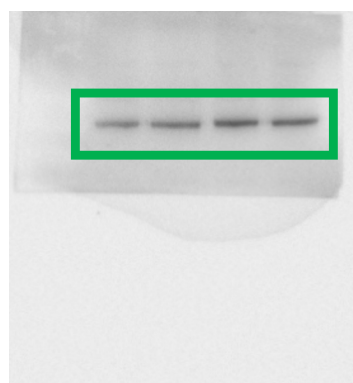

HDAC9

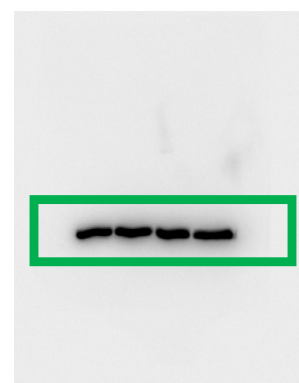

GAPDH

The lanes in green box correspond to those shown in the manuscript.

# Figure 1

Figure 1G

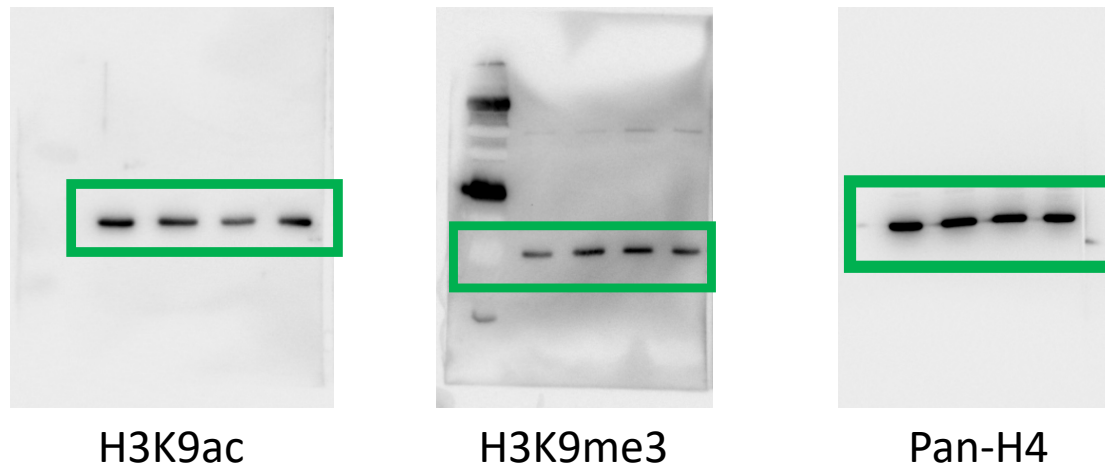

Figure 1H

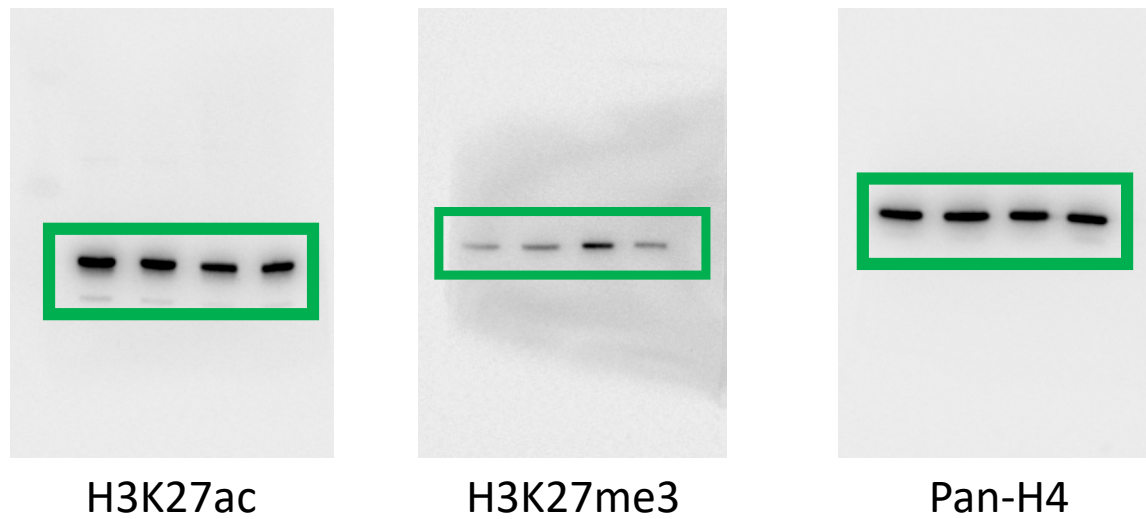

The lanes in green box correspond to those shown in the manuscript.

Figure 2

Figure 2D

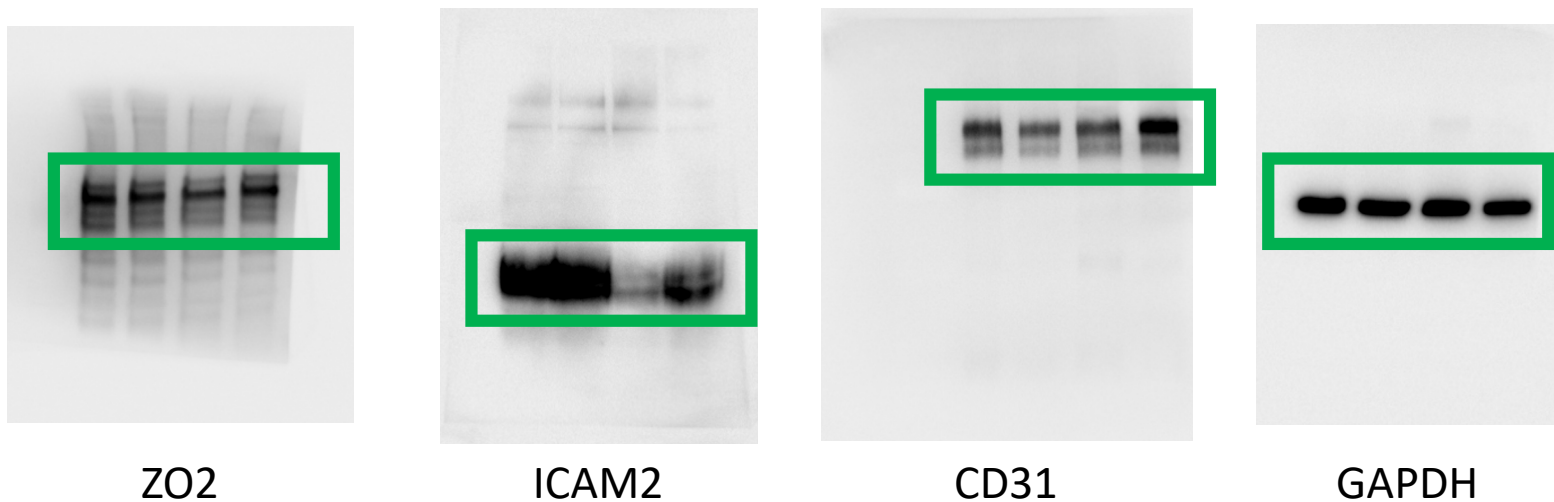

Figure 2E

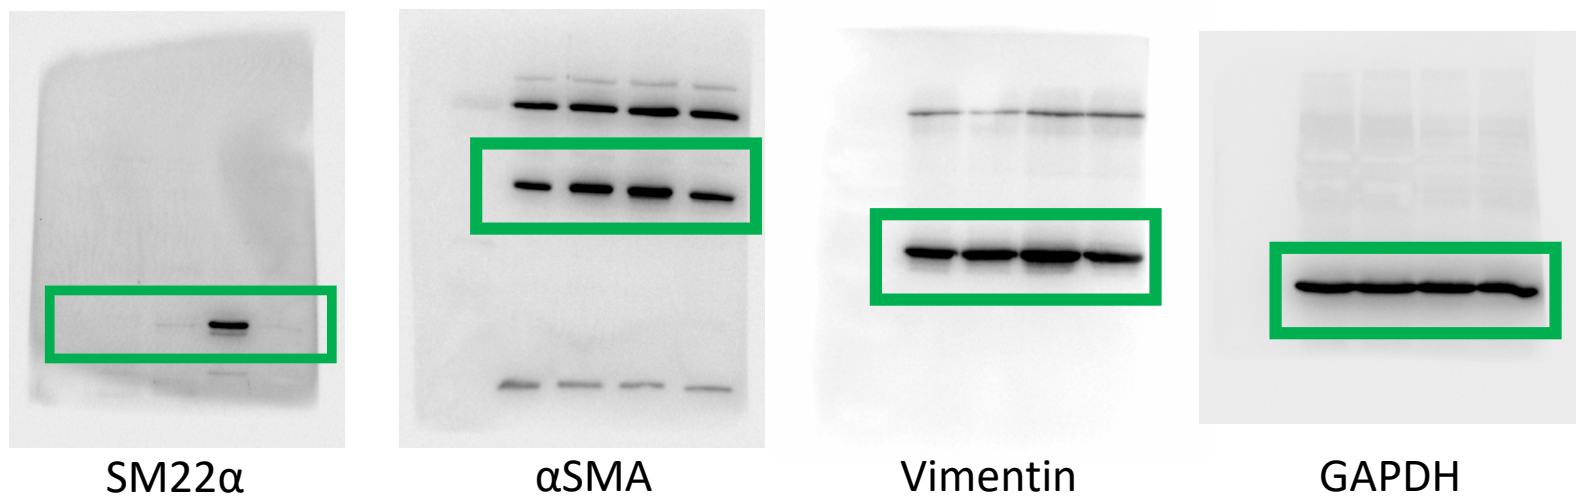

The lanes in green box correspond to those shown in the manuscript.

Figure 2

Figure 2F

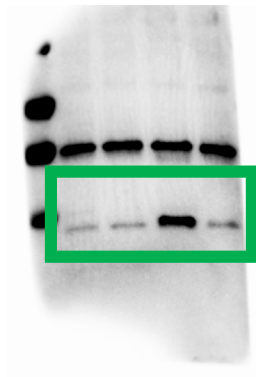

Slug

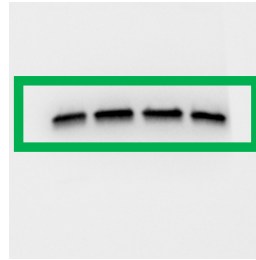

GAPDH

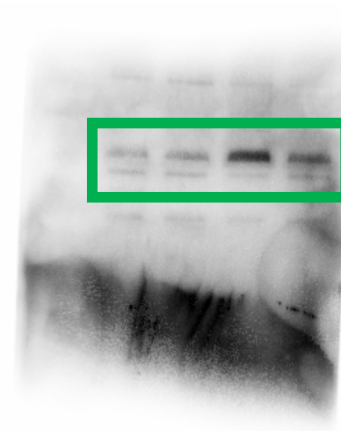

pSMAD2

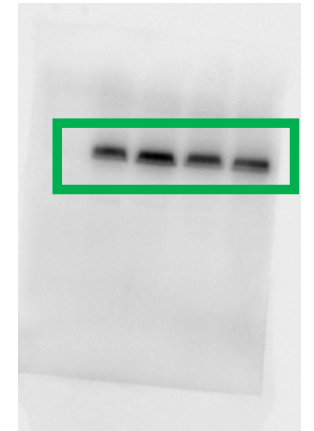

SMAD2

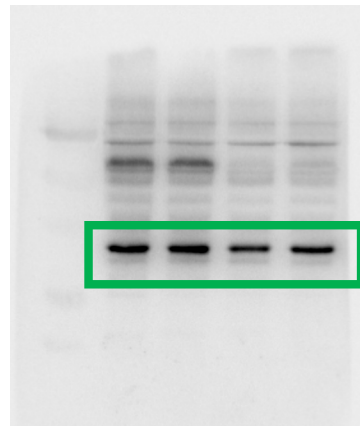

pSMAD3

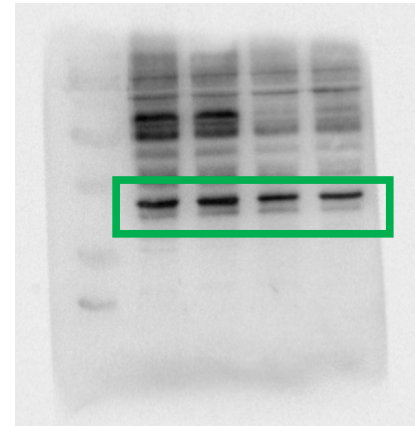

SMAD3

The lanes in green box correspond to those shown in the manuscript.

# Supplemental Figure 1

## Supplemental Figure 1F

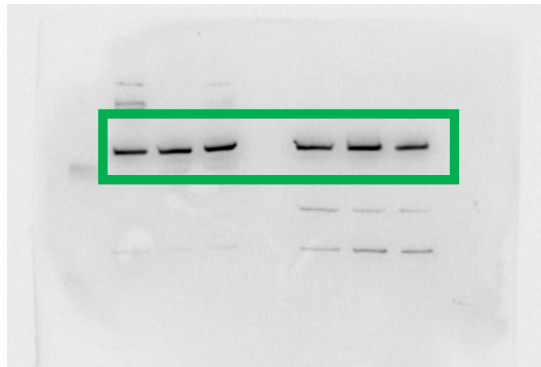

HDAC9

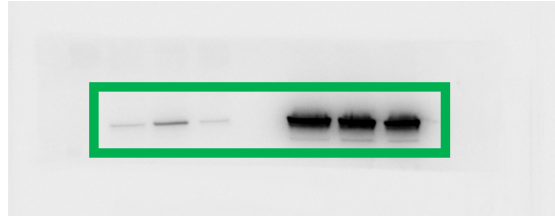

GAPDH

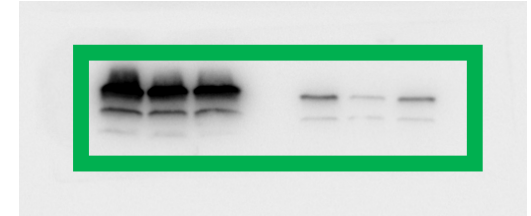

Histone 3

## Supplemental Figure 1G

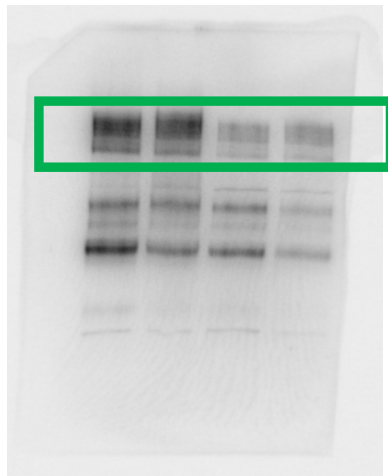

p300

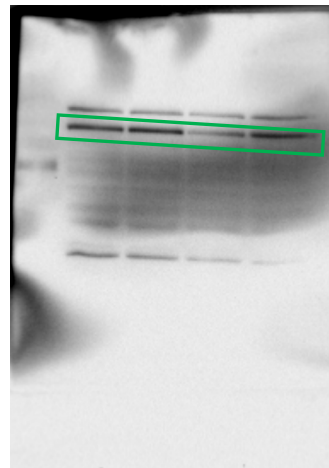

PCAF

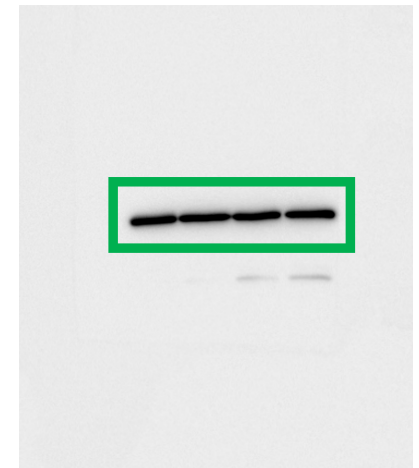

GAPDH

The lanes in green box correspond to those shown in the manuscript.

# Supplemental Figure 5

## Supplemental Figure 5B

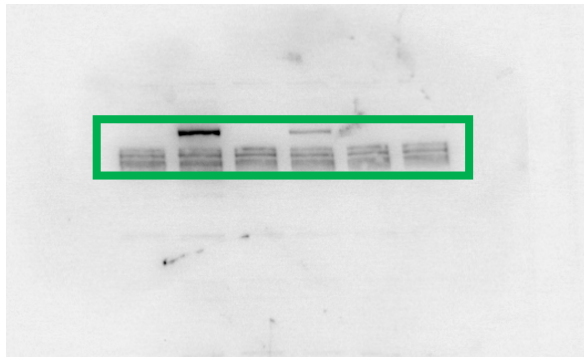

HDAC9

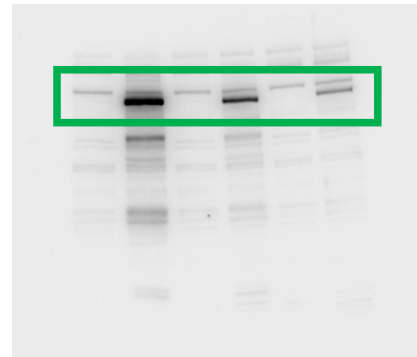

FLAG

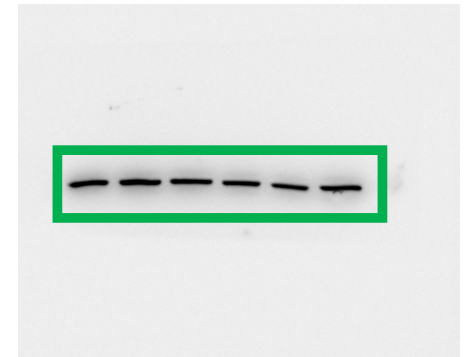

GAPDH

## Supplemental Figure 5D

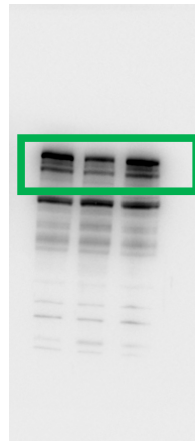

ZO2

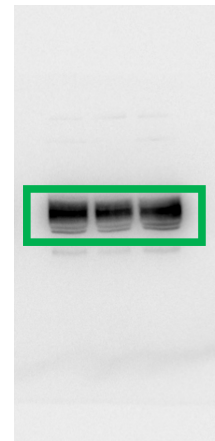

ICAM2

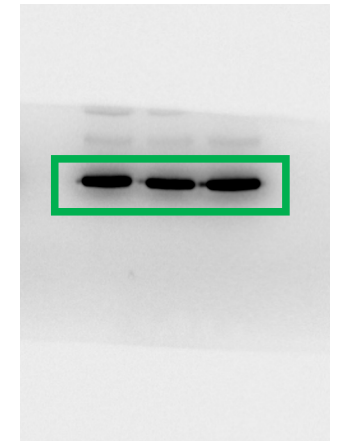

GAPDH

The lanes in green box correspond to those shown in the manuscript.
